# A systematic evaluation of yeast sample preparation protocols for spectral identifications, proteome coverage and post-isolation modifications

Maxime den Ridder, Ewout Knibbe, Wiebeke van den Brandeler, Pascale Daran-Lapujade and Martin Pabst\*

Delft University of Technology, Department of Biotechnology, van der Maasweg 9, 2629 HZ Delft, The Netherlands

**ABSTRACT.** The importance of obtaining comprehensive and accurate information from cellular proteomics experiments asks for a systematic investigation of sample preparation protocols, particularly when working with unicellular organisms with strong cell walls, such as found in the model organism and cell factory *S. cerevisiae*. Sample preparation protocols may bias towards specific protein fractions or challenge the analysis of native protein modifications due to reagent-induced artefacts. Here, we performed a systematic comparison of sample preparation protocols using a matrix of different conditions commonly applied in whole cell lysate proteomics. The different protocols were evaluated for their overall fraction of identified spectra, proteome and amino acid sequence coverage, GO-term distribution and number of peptide modifications, by employing a combination of database and unrestricted modification search approaches. The best proteome and amino acid sequence coverage was achieved by using Urea combined with filter-aided or in-solution digestion protocols, where the overall outcomes were strongly influenced by the employed quenching procedure. Most importantly, the use of moderate incubation temperatures and times, circumvented excessive formation of modification artefacts. Extensive reagent-induced peptide modifications, however, were observed when using solvents such as acetone or additives such as formic acid. Moreover, several filter material-related modifications were observed when employing the filter-aided procedures. Ultimately, the best protocols enabled the identification of approximately 65–70% of all acquired fragmentation spectra, where additional *de novo* sequencing suggests that unidentified spectra were largely of too low spectral quality to provide confident spectrum matches. This study demonstrates the large impact of different sample preparation procedures on the proteomic analysis outcome, where the collected protocols and large sets of associated mass spectrometric raw data provide a resource to evaluate and design new protocols and guide the analysis of (native) peptide modifications in the model eukaryote yeast.

## INTRODUCTION

Despite recent advancements in mass spectrometric instrumentation, a large fraction of fragmentation spectra (MS/MS) from bottom-up shotgun proteomics experiments usually remain unidentified [1, 2]. Amongst the many possible reasons, a decreased identification rate can result from the presence of non-peptidic contaminants (particularly surfactants), increased spectral complexity due to co-fragmentation of multiple precursor ions, low-quality spectra due to poor and incomplete peptide fragmentation, unexpected peptide sequence variants or co/post-translational modifications that are not covered by the database, as well as deficiencies of the database search scoring schemes used to match the spectra. The latter led to the development of iterative approaches or to the combined use of orthogonal database search algorithms [3–7]. However, a significant fraction of unassigned MS/MS spectra may also be a consequence of incomplete or nonspecific proteolytic cleavage, or result from unintended peptide modifications introduced during sample preparation when using highly reactive chemicals. In fact, sample preparation can be one of the most significant contributors to data variation and poor comparability between proteomics experiments [8]. Hence, selecting the most suitable sample preparation protocol is essential for

enabling a deep proteome coverage and for confidently identifying and quantifying (novel) peptide modifications. Moreover, the (native) *in vivo* state of the proteins should be preserved as good as possible. Therefore, sample preparation protocols usually include quenching of the cellular metabolism subsequently after sampling. This is in particular of importance, when investigating reversible post-translational modifications, which may be rapidly cleaved by the many hydrolytic enzymes present in every cell [9]. However, different quenching strategies, such as using ethanol or trichloroacetic acid (TCA) [10, 11], have been shown to differently impact the outcome of proteomics experiments [11]. Following protein extraction, proteins are solubilised and commonly denatured (e.g., with Urea), disulphide bonds are reduced by e.g., with Dithiothreitol (DTT) or Tris(2-carboxyethyl)phosphine (TCEP), alkylated using reagents such as iodoacetamide (IAA) or acrylamide (AA) to avoid reoxidation of the sulfhydryl groups [12, 13] and finally proteolytically cleaved (typically with trypsin) to create protein fragments that are sufficiently small for efficient measurement, but that retain sufficient unique sequence information for the subsequent protein identification step. Chemicals, or their employed concentrations, are often not compatible with the following steps in the protocol and, therefore, require removal by

1 methods such as protein precipitation e.g., with acetone or  
2 Trichloroacetic acid (TCA), or filter-aided approaches [14–  
3 20]. The type and pH of the buffer used during the final  
4 proteolytic digestion may ultimately also impact the amino  
5 acid cleavage site specificity [21]. Finally, non-peptidic  
6 compounds and non-volatile salts are removed before  
7 analysis by the aid of solid-phase extraction (SPE), using  
8 different types of reverse-phase or mixed-mode resins [22].  
9 However, combinations of different sample preparation  
10 procedures are expected to differently bias the proteomic  
11 analysis outcome. The selected protocol, therefore, may  
12 influence the proteome fraction or native modifications that  
13 can be detected and quantified significantly [23]. In addition,  
14 when investigating the biological significance of peptide  
15 modifications, the observed modification needs to be traced  
16 back to its co/post-translational or sample processing origin.  
17 However, without appropriate controls, this is a highly  
18 challenging procedure. For example, formylation can occur as  
19 a natural histone modification [24], but may also be introduced  
20 during sample preparation when using formic acid-containing  
21 buffers, such as those used to increase the solubility of  
22 hydrophobic peptides [25, 26]. Similarly for carbamylation,  
23 this modification has been associated with severe renal and  
24 cardiovascular disorders; however, it may also originate from  
25 high molarity Urea-containing buffers used during protein  
26 denaturation [27]. Alkylation of cysteine residues has become  
27 standard practice in proteomics experiments, which however  
28 due to over- or off-target alkylation reactions frequently  
29 introduces unintended peptide modifications, such as double  
30 alkylation artefacts, which for the case of IAA (114.04 Da)  
31 mimics the C-terminal glycine residue of ubiquitin [12, 13, 28,  
32 29]. Nevertheless, recent studies suggest that disulphide  
33 reduction and cysteine alkylation may not be essential to  
34 achieve a good proteome coverage. This would therefore  
35 eliminate the exposure of the peptides to highly reactive  
36 alkylating reagents [30]. Furthermore, chemically labile amino  
37 acid residues may undergo sample preparation induced  
38 oxidation, deamidation, pyroglutamate formation, dehydration  
39 or excessive metal ion adduct formation [31–33]. Many of  
40 those modifications (or adducts) may, however, also occur as  
41 consequence of the natural protein ageing processes within the  
42 cell and are, therefore, difficult to discriminate from sample  
43 preparation artefacts [34].  
44 A systematic evaluation – using a matrix-like approach, which  
45 leaves out one chemical at a time – and which investigates the  
46 impact on i) the % of identifications, ii) proteome coverage, iii)  
47 GO-term distribution and iv) post-isolation modifications, has  
48 not been performed for an unicellular organism to date. We  
49 therefore constructed a matrix of conditions, which include  
50 steps frequently employed in whole cell lysate proteomics, and  
51 applied it to the preparation of well-controlled chemostat  
52 grown yeast cells. The outcomes of the proteomics experiments  
53 were compared for their obtained proteome and amino acid  
54 sequence coverage and for their GO-term profiles. Moreover,

55 we performed an unrestricted modification search using  
56 TagGraph, to identify reagent-induced modifications. Finally,  
57 we investigated the quality of the unidentified spectra using *de*  
58 *novo* peptide sequencing. In summary, this study provides a  
59 systematic evaluation of sample preparation protocols for the  
60 increasingly studied model organism and cell factory yeast.  
61 Thereby, we demonstrate the large impact of the different  
62 sample preparation procedures on proteome coverage and  
63 overall identification rates.  
64 Ultimately, the performed study and publicly available large  
65 proteomics datasets, provide a valuable resource to select for  
66 the most suitable sample preparation elements for different  
67 experiments, and support the analysis of (native) peptide  
68 modifications.

## 70 EXPERIMENTAL SECTION

71 **Yeast strain, growth media and storage.** In this study, we  
72 used the minimal glycolysis (MG) yeast strain IMX372  
73 (*MATa ura3-52 his3-1 leu2-3,112 MAL2-8c SUC2*  
74 *glk1::SpHis5, hxx1::KILEU2, tdh1::KIURA3, tdh2, gpm2,*  
75 *gpm3, eno1, pyk2, pdc5, pdc6, adh2, adh5, adh4*), which  
76 under the selected growth conditions shows now phenotypic  
77 alterations compared to the parent CEN.PK lineage [35, 36].  
78 Shake flask and chemostat cultures were grown in synthetic  
79 medium (SM) containing 5.0 g·L<sup>-1</sup> (NH<sub>4</sub>)<sub>2</sub>SO<sub>4</sub>, 3.0 g·L<sup>-1</sup>  
80 KH<sub>2</sub>PO<sub>4</sub>, 0.5 g·L<sup>-1</sup> MgSO<sub>4</sub>·7H<sub>2</sub>O and 1 mL·L<sup>-1</sup> trace  
81 elements in demineralized water. The medium was heat  
82 sterilized (120°C) and supplemented with 1 mL·L<sup>-1</sup> filter  
83 sterilized vitamin solution [37]. For shake flask cultures 20  
84 g·L<sup>-1</sup> heat sterilized (110°C) glucose (SMG) was added. In  
85 chemostat cultures, 7.5 g·L<sup>-1</sup> glucose was added and the  
86 medium was supplemented with 0.2 g·L<sup>-1</sup> antifoam Pluronic  
87 PE 6100 (BASF, Ludwigshafen, Germany). Frozen stocks  
88 of *S. cerevisiae* cultures were prepared by the addition of  
89 glycerol (30% v/v) in 1 mL aliquots for storing at -80°C.  
90 **Yeast chemostat cultures and sampling.** Aerobic shake  
91 flask cultures were grown at 30°C in an Innova incubator  
92 shaker (New Brunswick™ Scientific, Edison, NJ, USA) at  
93 200 rpm using 500 mL round-bottom shake flasks  
94 containing 100 mL medium. Duplicate aerobic chemostat  
95 cultures were performed in 2 L laboratory fermenters  
96 (Applikon, Schiedam, The Netherlands) with a 1 L working  
97 volume in duplicate. SM-medium was used and maintained  
98 at pH 5 by the automatic addition of 2 M KOH. Mixing of  
99 the medium was performed with stirring at 800 rpm. Gas  
100 inflow was filter sterilized and compressed air (Linde Gas,  
101 Schiedam, The Netherlands) was sparged to the bottom of  
102 the bioreactor at a rate of 500 mL·min<sup>-1</sup>. Dissolved oxygen  
103 levels were measured with Clark electrodes (Mettler  
104 Toledo, Greinfensee, Switzerland). The temperature of the  
105 fermenters was maintained at 30°C. The reactors were  
106 inoculated with exponentially growing shake flask cultures

of *S. cerevisiae* strain IMX372 to obtain an initial optical density (OD<sub>660</sub>) of approximately 0.4. Following the batch phase, the medium pump was switched on to obtain a constant dilution rate of 0.10 h<sup>-1</sup>. Chemostat cultures were assumed to be in steady state when, after five volume changes, the culture dry weight, oxygen uptake rate and CO<sub>2</sub> production rate varied less than 5% over at least 2 volume changes. The dilution rate and carbon recovery were determined after each experiment. **Analytical methods.** OD<sub>660</sub> measurements to monitor growth were performed on a JENWAY 7200 spectrophotometer (Cole-Parmer, Stone, UK). The biomass dry weight was determined in duplicate by extracting 10 mL of broth and filtrating it over a filter with 0.45 µm Ø pores while a vacuum was applied to the filter. The filters were washed twice with 10 mL of demineralized water. Prior to use, the filters were dried in the oven for at least 24 hours at 70°C. After filtration, the filters were dried in a microwave oven at 360 W for 20 min leaving only dry biomass. For extracellular metabolite determinations, broth samples were centrifuged for 5 min at 13,000 g and the supernatant was collected for subjection to a Waters alliance 2695 HPLC (Waters Chromatography B.V., Etten-Leur, The Netherlands) with an Animex HPX-87H ion exchange column (Bio-Rad, Hercules, CA, USA). The HPLC was operated at 60°C and 5 mM of H<sub>2</sub>SO<sub>4</sub> was used as mobile phase at a rate of 0.6 mL·min<sup>-1</sup>. Off-gas concentrations of CO<sub>2</sub> and O<sub>2</sub> were measured using an NGA 2000 analyzer. Proteome samples (1 mL, at approx. 3.6 g·L<sup>-1</sup> dry weight) were taken from steady state cultures. The samples were collected in multifold in trichloroacetic acid (TCA) (Merck Sigma, Cat. No. T0699) with a final concentration of 10% or in five volumes of ice-cold methanol (MeOH) (Thermo Fisher, Cat. No. 15654570). Samples were centrifuged at 4000 g for 5 min at 4°C. Cell pellets were frozen at -80°C [11]. **Proteomics sample preparation protocols (an extended version of all sample preparation protocols are provided in the SI document).** Yeast cell culture pellets were resuspended in lysis buffer composed of 100 mM triethylammonium bicarbonate (TEAB) (Merck Sigma, Cat. No. T7408) containing 0.1%, 1% sodium dodecyl sulphate (SDS) (Merck Sigma, Cat. No. L4522) or 8 M Urea (Merck Sigma, Cat. No. U5378) and phosphatase/protease inhibitors. Yeast cells were lysed by glass bead beating and thus shaken 10 times for 1 minute with a bead beater alternated with 1 minute rest on ice. For in-solution methods, proteins were reduced by addition of 5 mM DTT (Merck Sigma, Cat. No. 43815) or 5 mM TCEP (Merck Sigma, Cat. No. C4706) and incubated for 1 hour or 30 min at 37°C or 56°C, respectively. Subsequently, the proteins were alkylated for 30 min or 1 hour at room temperature in the dark by addition of 15 mM

iodoacetamide (Merck Sigma, I1149) or 50 mM acrylamide (AA) (Merck Sigma, Cat. No. A9099), respectively. Protein precipitation was performed by addition of four volumes of ice-cold acetone (-20°C) (Merck Sigma, Cat. No. 650501) or TCA to a final concentration of 20% and proceeded for 1 hour at -20°C or 30 min at 4°C, respectively. The proteins were washed twice with acetone and subsequently solubilized using 100 mM ammonium bicarbonate (ABC) (Merck Sigma, Cat. No. 09830). Alternatively, for filter-aided sample preparation (FASP), proteins were loaded to a filter (Merck-Millipore, Microcon 10 kDa, Cat. No. MRCPT010) after bead beating and reduced by addition of DTT and alkylated with iodoacetamide, as described earlier. After alkylation, proteins were washed four times with TEAB and ABC buffers. For all protocols, proteolytic digestion was performed by Trypsin (Promega, Cat. No. V5111), 1:100 enzyme to protein ratio (v/v), and incubated at 37°C overnight. For filter-aided sample preparation protocols, peptides were eluted from the filters after digestion using ABC and 5% acetonitrile (ACN) (Thermo Fisher, Cat. No. 10489553) / 0.1% formic acid (FA) (Thermo Fisher, Cat. No. 10596814) buffers consecutively. For all protocols, solid phase extraction was performed with an Oasis HLB 96-well µElution plate (Waters, Milford, USA, Cat. No. 186001828BA). Peptide fractions were eluted using MeOH buffer containing trifluoroacetic acid (TFA) (Merck Sigma, Cat. No. 302031), FA or ABC. Eluates were dried using a SpeedVac vacuum concentrator. Dried peptides were resuspended in 3% ACN / 0.01% TFA prior to MS-analysis to give an approximate concentration of 500 ng per µL. **Shotgun proteomic analysis.** For each protocol an aliquot corresponding to approx. 750 ng protein digest was analysed using a one-dimensional shotgun proteomics approach [38]. Each sample was analysed in two technical replicates. Briefly, the samples were analysed using a nano-liquid-chromatography system consisting of an EASY nano LC 1200, equipped with an Acclaim PepMap RSLC RP C18 separation column (50 µm x 150 mm, 2 µm, Cat. No. 164568), and a QE plus Orbitrap mass spectrometer (Thermo Fisher Scientific, Germany). The flow rate was maintained at 350 nL·min<sup>-1</sup> over a linear gradient from 5% to 30% solvent B over 90 min, then from 30% to 60% over 25 min, followed by back equilibration to starting conditions. Data were acquired from 5 to 120 min. Solvent A was H<sub>2</sub>O containing 0.1% FA, and solvent B consisted of 80% ACN in H<sub>2</sub>O and 0.1% FA. The Orbitrap was operated in data-dependent acquisition (DDA) mode acquiring peptide signals from 385–1250 m/z at 70,000 resolution in full MS mode with a maximum ion injection time (IT) of 100 ms and an automatic gain control (AGC) target of 3E6. The top 10 precursors were selected for



MS/MS analysis and subjected to fragmentation using higher-energy collisional dissociation (HCD). MS/MS scans were acquired at 17,500 resolution with AGC target of 2E5 and IT of 75 ms, 2.0 m/z isolation width and normalized collision energy (NCE) of 28. **Mass spectrometric raw data processing. De novo sequence analysis.** *De novo* sequencing was performed using the algorithm available via PEAKS Studio X+ (Bioinformatics Solutions Inc., Waterloo, Canada) [39], allowing 10 ppm parent ion and 0.5 Da fragment ion mass error, and oxidation as variable modification, where the resulting *de novo* sequences were exported to 'de novo peptide.csv' files for further unrestricted modification search using TagGraph, as described below. **Taxonomic profiling.** Taxonomic purity assessment using the same *de novo* peptide sequences was performed as described recently by H.B.C. Kleikamp et al. (2021) [40]. **Database searching.** Database searching against the proteome database from *S. cerevisiae* (Uniprot, strain ATCC 204508 / S288C, Tax ID: 559292, June 2020, excluding 13 glycolytic isoenzymes) was performed using PEAKS Studio X+, allowing for 20 ppm parent ion and 0.02 m/z fragment ion mass error, 3 missed cleavages, carbamidomethyl or acrylamide as fixed (or none), and methionine oxidation and N/Q deamidation as variable modifications. To control false-positive peptide identifications, a uniform 1% false discovery rate (FDR) was applied to peptide spectrum matches (PSM), and subsequently the protein identifications required  $\geq 2$  unique peptides. Results from the PEAKS DB search were exported to 'proteins.csv' and 'DB search psm.csv' files, containing the identified proteins and identified DB search peptide-spectrum matches, respectively. **Unrestricted modification search.** TagGraph [41] was used to perform unrestricted global peptide modification search using the (mzML-formatted) mass spectrometric raw data and the *de novo* sequences obtained from PEAKS Studio, using the yeast proteome database plus the CRAPome contaminant sequences [42]. The analysis was performed allowing for 10 ppm precursor mass tolerance, cysteine carbamidomethylation or acrylamidation as static modifications, and methionine oxidation as a differential modification, as described by Devabhaktuni et al. (2019) [41]. TagGraph.1.8 was installed on a Windows desktop Docker container, and the processing of multiple files was automated via a PowerShell script. An FDR of 1%, 10 ppm parent ion and a maximum absolute deviation of 0.1 Da between experimental and database modification mass were applied to the analysis results and these were exported to '.txt' files for further analysis. **Interconversion of mass spectrometric raw data.** Conversion of the mass spectrometric raw data was performed using peak picking

'vendor' into '.mzML' and '.mzXML' using the msConvertGUI tool (ProteoWizard) [43]. **Identification of scans originating from glycopeptides.** First, the fragmentation spectra were searched for the presence of glycan-typical HexNAc oxonium fragment ions (204.087, [M+H]<sup>+</sup>) using functions from the Matlab 'sugar miner' script as described recently [44]. Those scans indicate glycopeptides—which remain unidentified by the chosen database, or open modification search parameters. Scans with strong oxonium ion signals were summarized in an '.xlsx' table. **Data processing and visualization. Overall number of modified peptides and types of modifications.** The results of the unrestricted modification search using TagGraph were used to determine the overall volume as well as the types of modifications found after applying the different protocols. First, the mass shifts (=deviations from the unmodified peptide mass) were collected from the ".txt" files and binned using the Matlab 'histcounts' function, at a bin width of 0.01 Da. This procedure was done for the combined dataset as well as for each protocol separately. Mass shifts with more than 5 occurrences per averaged conditions were tested for significant changes across all protocols using Matlabs 'anova1' function. Mass shifts with significant changes ( $p < 0.01$ ) across all conditions (2 biological and 2 technical replicates) were visualized by Euclidean distance clustering using the Matlab 'clustergram' function, standardizing along the rows (mass shifts) of data, clustering along the columns of data, and then clustering along the rows of row-clustered data. Default color variation has been used which shows for values between -3 and 3, where values above and below show the same maximum color tone. **Spectral Average Local Confidence (ALC) score histograms.** After the scan numbers of each protocol were allocated to different categories, the Average Local Confidence (ALC) score distribution for identified and unidentified MS/MS scans was determined to evaluate the quality of the unidentified spectra. The ALC score was extracted from the *de novo* sequences '.csv' files and were therefore only determined for the spectra that were *de novo* sequenced. The ALC scores of the identified and unidentified scans were binned separately using the 'histcounts' function in Matlab. The resulting distributions were plotted as bar graph and exported as table. **Proteome and amino acid sequence coverage.** The proteome coverage was determined using the PEAKS-DB search results 'proteins.csv'. For this, the number of proteins per protocol was calculated from proteins with  $> 2$  unique peptides per protein. The percentage of observed proteins for each protocol was subsequently calculated by normalizing to the number of total proteins in the *S. cerevisiae* (Uniprot) protein sequence

1 database. The average protein sequence coverage per  
2 protocol was further extracted from the PEAKS  
3 'proteins.csv' output files. The sequence coverage (%) was  
4 moreover used to determine the amino acid coverage, in  
5 which the sequence coverage of each identified protein was  
6 summed and related to the total number of protein  
7 sequences present in the sequence database. The average for  
8 the proteome and amino acid coverage was calculated for  
9 each biological replicate and the deviations from the  
10 average for each protocol were plotted as bar graphs. A two-  
11 tailed unpaired Student's t-test was performed to determine  
12 if the relative coverage change between protocols was  
13 statistically significant. **Ontology analysis.** The  
14 'proteins.csv' files obtained through PEAKS-DB were used  
15 to determine the differences in the cellular component  
16 distribution. Python 3.8 [45] was used to programmatically  
17 link the Uniprot accession numbers of the identified  
18 proteins (with 2 unique peptides) to the Gene Ontology  
19 (GO) [46] terms using Retrieve/ID Mapping function on  
20 Uniprot [47]. The GO library was imported using the  
21 'goatools' module in Python to retrieve the cellular  
22 component terms in the GO hierarchy. Functions of the  
23 proteins were summarized in pie charts and bar graphs  
24 based on their cellular component GO terms. GO terms with  
25 less than one percentage contribution were clustered into  
26 category "other". **Overall % of identified fragmentation**  
27 **spectra.** The overall number of identified fragmentation  
28 (MS/MS) spectra for each protocol was determined by  
29 combining the outputs obtained from TagGraph, PEAKS  
30 database search and the sugar oxonium ion search. First,  
31 scan numbers that did not result into amino acid sequence  
32 candidates by PEAKS *de novo* sequencing were allocated to  
33 the 'No ALC' category. Next, identifications were extracted  
34 from the TagGraph files. Thereby, identified scans were  
35 allocated to two categories, 'unmodified peptides' and  
36 'modified peptides'. The scan numbers of the peptides  
37 identified with the second search engine were extracted  
38 from the PEAKS-DB search peptide-spectrum matches files  
39 'DB search psm.csv'. The scan numbers were compared  
40 with the scans of the *de novo* sequences and TagGraph  
41 results. Identifications that were only found with PEAKS  
42 database search, were allocated to the 'second search  
43 engine' category. The category "sugars" represents the  
44 scans that were identified as potential glycopeptides. If  
45 scans were present in multiple categories, including  
46 TagGraph, the scans were allocated to TagGraph  
47 identifications (modified or unmodified peptides). If scans  
48 were identified containing sugar fragments and by PEAKS  
49 database search, the scans were allocated to PEAKS-DB  
50 search identifications. Furthermore, 'No ALC'-allocated  
51 scans that could be identified containing sugar fragments or

52 via PEAKS database search, were allocated to one of the  
53 respective categories. Finally, the MS/MS scans that could  
54 not be identified by any of the before mentioned categories,  
55 were allocated to the 'unidentified scans' category. As final  
56 check, the summed scans of all established categories  
57 required to be equal to the sum of MS/MS scans in the raw  
58 mzXML files. The distribution of the scan identifications  
59 amongst different categories was visualized using stacked  
60 bar graphs, in which the number of scans in each category  
61 was normalized against the total number of MS/MS scans  
62 in percentages, for each protocol. **Data availability.** Mass  
63 spectrometric raw data, protein sequence database, and  
64 search files have been deposited at ProteomeXchange  
65 server and are publicly available under the project code  
66 PXD026806.

## 68 RESULTS AND DISCUSSION

69 **Comparison of yeast whole cell lysate sample**  
70 **preparation protocols.** A systematic comparison of a matrix  
71 of different sample preparation procedures was performed to  
72 investigate the impact on spectral identification rates and  
73 quality, achieved proteome coverage, amino acid sequence  
74 coverage, GO-terms distribution and reagent-induced peptide  
75 modifications (Table 1, Figure 1). Duplicate aerobic chemostat  
76 cultures of the IMX372 *S. cerevisiae* strain [36] were cultured  
77 in glucose-limiting conditions (Supplementary Table S1),  
78 which provided highly reproducible yeast cell biomass.  
79 Proteome samples were taken during steady-state conditions  
80 from both biological replicates, in which the cellular  
81 metabolism was quenched using ice-cold TCA or methanol to  
82 preserve the proteome and associated post-translational  
83 modifications. Cell lysis was performed with SDS- or Urea-  
84 containing buffers employing bead-beating in all cases. Crude  
85 cell lysates were then treated with an in-solution or FASP  
86 approach, in which proteins were reduced with TCEP or DTT  
87 and alkylated with iodoacetamide, acrylamide or alternately,  
88 were left untreated. For in-solution digestion methods, proteins  
89 were precipitated with acetone or TCA. After overnight  
90 digestion with trypsin, solid-phase extraction was performed to  
91 remove contaminants by SPE using Oasis HLB cartridges,  
92 which make use of a co-polymer of divinylbenzene and vinyl  
93 pyrrolidinone that shows an enhanced retention of polar  
94 peptides (Waters). Elution from the cartridges was achieved  
95 with a variety of buffers to assess the influence of different  
96 additives (Table 1). Finally, the samples of the different  
97 protocols were analysed using a (short) one-dimensional  
98 gradient with duplicate injections.

99 On average,  $35420 \pm 5909$  (biological replicate 1) and  
100  $37261 \pm 8271$  (biological replicate 2) MS/MS scans were  
101 obtained across all protocols (Figure 2, Supplemental Figure  
102 S1). Furthermore, the analysis of the protocols resulted in  
103  $23631 \pm 5237$  and  $23477 \pm 6590$  peptide spectrum matches  
104 (PSMs) (Figure 2a), resulting in 66% and 61% MS/MS

spectrum identifications on average (Figure 2b). However, protocols 8 and 14 resulted consistently in a considerable lower number of MS/MS spectra for both biological replicates, albeit that a comparable amount of proteolytic digest (750 ng) was analysed. For protocol 8, protein precipitation was performed with TCA/acetone instead of acetone solely. Difficulties in redissolving the protein pellet can arise for the TCA/acetone precipitation approach and may ultimately impact the overall recovery. It therefore becomes necessary to use stronger buffers, larger volumes and additional mechanical disruption of the pellet, to solubilise the protein [15, 18, 48]. In this study, protein pellets were dissolved in ammonium bicarbonate buffers to allow subsequent trypsin digestion, which did not prove difficult for acetone-precipitated samples. However, the TCA/acetone procedure led to a partially insoluble pellet, and a considerably lower number of proteins were in the following identified, compared to when only using acetone-precipitation (20% vs. 29% proteome coverage for protocol 8 = TCA/acetone, vs protocol 7 = acetone; Figure 2c). Similar results were observed in other studies, which was attributed to the increased protein denaturation caused by this approach [15, 49] [50] [51]. Samples treated according to protocol 14 were subjected to FASP using an SDS containing buffer. SDS is known to interfere with binding and elution during the reverse-phase separation of the peptides and severely suppresses ionisation by electrospray ionisation [52–54]. Multiple rounds of centrifugation were applied to ensure SDS removal, however, residual SDS may have still impacted the LC-MS/MS analysis, resulting in a lower total number of MS/MS scans (13232 MS/MS spectra on average for protocol 14, vs. 36340 MS/MS spectra on average across all protocols). However, an earlier study buffer exchanged SDS with Urea following solubilisation of the proteins, allowing for high protein identification rates, because SDS was likely successfully withdrawn from the sample [19]. Hence, FASP sample preparation in combination with SDS-containing buffers is not recommended unless the complete removal of SDS can be ensured.

**Overall proteome coverage is strongly affected by sample preparation procedures.** MS/MS spectra were identified using database searching employing common statistical filtering criteria (see materials and methods) and requiring at least 2 unique peptides per protein identification. The proteome coverage was calculated based on the proteins identified per protocol as a percentage of the total number of proteins in yeast (known ORFs). An average proteome coverage of approximately 26% and 27% was achieved amongst the different methods for biological replicates 1 and 2, respectively (Figure 2c). Small differences in the average depth of the proteome coverage between both biological replicates were observed, most likely because the experiments were conducted at different

time periods and, therefore, the instrumental performance may have been slightly different. Three protocols (6, 8 and 14) differed substantially from the other procedures. As discussed above, for protocols 8 and 14, LC-MS/MS analysis was likely compromised by incompatibility with the used reagents. Protocol 6, on the other hand, resulted in an average number of 39152 MS/MS spectra, which is slightly higher than the average of 36341 MS/MS spectra across all protocols (Figure 2b). Since the total ion count was very comparable, it is suggestive that a similar amount of proteolytic digest was injected to the LC-MS system. This was the only sample that was subjected to quenching with methanol as opposed to TCA during sampling. Methanol quenching (applied to yeast) might, therefore, significantly impact the number of identifiable proteins. TCA as a quenching solution has been also proven useful in quantitative phosphoproteomics measurements recently [11]. Methanol, on the other hand, is routinely employed to rapidly arrest the cellular metabolism when performing metabolomics studies [55]. Methanol has been also used to co-extract metabolites and proteins from yeast, only recently [56]. In the present study, the methanol quenching bias was observed consistently for all biological and technical replicates. Protein aggregation due to exposure to methanol followed by poor resolubilisation is likely the cause for the low proteome coverage, however, the exact mechanism remains to be explored. Nonetheless, the highest proteome coverage (31% and 32%, for biological replicates 1 and 2, respectively) was obtained with sample 13, in which a filter-aided approach was used in combination with Urea buffer. Similar results have been found in previous studies, in which FASP outperformed in-solution approaches in terms of the number of protein identifications [57, 58]. The proteome coverage does not seem to have been significantly impacted by the type of detergent used during lysis (SDS or Urea) for samples 7 and 12, respectively. Typically, SDS is used as an ionic and denaturing surfactant that can disrupt cell membranes and cause protein denaturation by disrupting protein–protein interactions. Urea, on the other hand, is a chaotrope that can bind to proteins, thereby causing protein unfolding [59]. Following protein extraction, protein reduction was performed by either TCEP or DTT. The type of reducing agent used during sample processing was also not a key determinant in the outcome of the proteome analysis. This was very similarly observed for yeast in another study [13]. In this study, proteins were subsequently alkylated with iodoacetamide, acrylamide or alkylation was left out completely (samples 7, 9 and 10, respectively). Expectedly, and in line with a recent publication [30], the absence of an alkylation step dramatically reduced the detection of cysteine-containing peptides, although the depth of the proteome coverage remained nearly unchanged. However, the number of



MS/MS scans and obtained peptide spectrum matches, as well as sequence coverage, was steadily lower for the non-alkylated sample (protocol 10), when compared to the alkylated samples (protocols 7 and 9). Furthermore, no significant changes in the number of identified proteins could be observed for the different solvents used for solid-phase extraction (protocols 1–5, 7, Figure 2 and Supplemental Table S2 and S3). Though, the number of MS/MS scans, identified proteins and proteome (sequence) coverage was consistently higher for protocol 7 (Figure 2, Supplemental Table S2 and S3), in which a combination of basic and acidic MeOH buffers were used for elution, thereby maximising the recovery of peptides across a large pH range. Moreover, TFA (protocol 7) appeared to be a better choice for peptide elution compared to formic acid (FA) (protocol 2 and 5) because the proteome (sequence) coverage was repeatedly higher when using TFA compared to FA (Supplemental Table S2 and S3).

A gene ontology (GO) analysis [46] was performed to investigate whether the different protocols bias towards specific cellular components, such as cytosolic soluble proteins, or oppositely, towards hydrophobic membrane proteins. Therefore, GO terms were assigned to proteins based on their ‘cellular component’. Thereby, the distribution of the cellular localisation of the observed proteins was comparable across the different protocols, which is exemplified in Figure 3a for protocol 13 (biological replicate 2, Supplemental Table S4). Approximately 53% accounted for the intracellular fraction (GO-term ‘organelle’), whereas ~11% of the identifications belonged to membrane proteins. Yet, a slight increase in the average relative value of membrane proteins was observed for protocols 8 and 14 (Figure 3b). Irrespective of the protocol, proteins were extracted using bead beating, which is a relatively harsh and likely reproducible approach. Nevertheless, a recent study demonstrated that extraction methods can significantly contribute to the variability of proteomics experiments [8].

Commonly, proteins are already reported with a few peptides, e.g. 2 unique peptides. While acceptable for qualitative and quantitative analysis, further characterisation of individual proteoforms as well as analysis of post-translational modifications demand a higher sequence coverage. Therefore, we quantified the fraction of the total proteome amino acid sequence space covered for every protocol. An average proteome sequence coverage of 6.7% and 7.0% was observed across all protocols for biological replicates 1 and 2, respectively (Figure 2d). Hence, for the employed (relatively short) one-dimensional gradient—despite the good proteome coverage—a rather small fraction of the amino acid sequence space was actually observed in our experiments. In the present study, an average protein sequence of 26% and 25% was obtained amongst the identified proteins (Supplemental Figure S2). This value is proportional to the

average amino acid sequence coverage of 28% obtained by Herbert et al. (2014), who obtained through extensive experiments a near-complete proteome coverage [61]. Nevertheless, the proteome coverage strongly depends on the protein amino acid sequences, and therefore, on the cleavage specificity of the employed protease(s) [60]. One of the challenges to improve proteome sequence coverage arises from signal suppression during electrospray ionisation (particularly for short one-dimensional gradients), where peptides with higher basicity tend to ionise preferably, and lower abundant peptides or highly hydrophobic or acidic peptides may remain undetected. Longer LC separations, additional peptide pre-fractionation, as well as 2-dimensional gradients significantly increases the number of identifications [62] [63–65]. Nevertheless, material requirements, sample processing and analysis time will increase proportionally, when using multi-dimensional chromatography or off-line peptide fractionation. Finally, multi-protease digestion has been demonstrated to boost not only the protein but also the proteome sequence coverage [66, 67].

As observed for the proteome coverage, protocols 6, 8 and 14 resulted in a much lower proteome sequence coverage (Figure 2d, Supplemental Table S2 and S3). Overall, while lysis buffer, reducing agent or SPE elution buffers seemingly did not impact proteome coverage, the alkylation step was critical for obtaining a high amino acid sequence coverage.

**The observed variability in peptide modifications.** By using an unrestricted modification search (TagGraph) 221751 and 181496 mass shifts were observed across all used protocols, which derived from 991759 and 1043314 MS/MS spectra for biological replicates 1 and 2, respectively (Figure 4). A highly comparable mass shift profile was observed for both technical and biological replicates, confirming the reproducibility of the chemostat cultivation [68], the sample preparation protocols and the shotgun analysis. To discriminate between peptide modifications from biological (co/post-translational) and sample processing origin, we searched for alterations (or mass shifts) that were predominantly (or exclusively) present when using certain sample preparation protocols. Hence, we searched for mass shifts that showed a significant change in frequency ( $p < 0.01$ ) across all conditions and replicates, of which the averaged occurrences across all protocols is shown in Figure 5 (Supplementary Table S5). Albeit we employed combinations of well-established sample preparation steps, we observed a distinct number of condition-specific modifications, of which some had not been linked to sample preparation artefacts before.

For example, two different approaches to quench the cellular metabolism were employed, using either TCA or methanol. A mass shift of -89.04 Da was prominent in TCA-arrested yeast cells, with the notable exception of protocol 14 (SDS/FASP protocol). Furthermore, we used reagents for cell lysis and protein denaturation such as SDS and Urea. Interestingly, we did not observe any mass shifts related to the use of those reagents. In aqueous solutions, Urea dissociates upon heating over time. One of its degradation products is iso-cyanate, which can react with the N-termini of proteins/peptides and at the side-chain amino groups of lysine and arginine residues, to mimic *in vivo* carbamylation (+43 Da). This reaction is enhanced by high temperatures; however, Urea solutions in our study were only heated to 37°C for 1 hour, whereas 56°C is commonly used for protein reduction with DTT or TCEP [69]. Furthermore, the use of ammonium-containing buffers (and the removal of Urea before over-night digestion) seemed to minimise protein carbamylation when using Urea solutions [70], which was also observed in our study. Therefore, the relatively mild procedure used by our protocols seemingly avoided carbamylation reactions taking place.

No significant mass shifts were observed between samples reduced with TCEP or DTT. This is in line with an earlier study demonstrating that both reducing agents resulted in the same number of protein identifications [12, 13]. Nevertheless, acrylamide appeared to be more efficient in combination with DTT, whereas iodoacetamide performed better with TCEP [12]. As expected, alkylation reagent-related mass shifts were the most abundant artefacts (e.g., +57.01 for IAA with 61582 and 53462 occurrences). However the frequently reported methionine alkylation and the subsequent neutral loss of -48 Da from the molecular peptide ion  $[M-48+H]^+$ , which is the loss of the side-chain from oxidised methionine (Mueller & Winter [12]), was rarely detected. Moreover, double alkylation with the characteristic mass delta of +114 Da was compared to counts for single alkylation (+57 Da) for all samples (on average) below <0.20%. That mass addition was also observed in the non-alkylated sample, suggesting that this mass shift resulted rather from ubiquitylation ('GlyGly') and not from excessive alkylation. The modification analysis further indicated that the applied alkylation procedure was sufficiently mild (in particular when removing excess reagent before over night digestion) with only little off-target, and hardly any excessive, alkylation taking place. On the other hand, all protocols that used IAA showed additional +39.98 Da mass additions, which presumably derive from an N-terminal S-carbamoylmethyl- cysteine cyclisation product [28, 71, 72]. Acrylamide showed only some additional -73.05 Da mass shifts at low frequency, the mechanism of which, however remains to be investigated. Interestingly, the protocol (10) employing reduction but no alkylation resulted in an additional series of (albeit low frequent) mass shifts (such as -59.05, 79.9, 94.9, 99.0), which likely originate from reactions of the free sulfhydryl group with compounds (naturally) being present in

cellular extracts. An unexpected observation was the very abundant mass addition of +40.03 Da (labelled in Unimod <http://www.unimod.org/> as 'propionaldehyde'). This mass shift was present in all protocols that employed protein precipitation with acetone, but was strongly reduced for protocols that used TCA with acetone wash, and which was absent in protocols using FASP. This mass shift was in a recent study related to acetone artefacts, which in fact can impact some 5% of the proteome (peptides with glycine as the second N-terminal amino acid) [17]. The 40 Da mass shift, however, can also be misinterpreted for an amino acid substitution from glycine to proline. Acetone modification involves aldimine formation between the ketone and the amino groups of a peptide, which is regarded as being acid labile and, therefore, rather rearranges to a more stable form (imidazolidinone), resulting in the observed +40.03 Da mass addition [17]. Interestingly, we observed some few mass additions of +41.03 Da, which may indicate the presence of the proposed aldimine intermediate. Other artefacts that presumably also derive from acetone, such as +98 Da and to a lesser extent +84 and +112 Da [73], were only observed at trace levels or were not present at all. However, it is suggested that those artefacts seemed to be more pronounced at elevated pH and, therefore, our protocols might have prevented their formation. Even though acetone may increase peptide complexity substantially, this procedure is still commonly used in sample preparations, likely because it efficiently removes organic compounds such as inhibitors or compromising detergents, such as SDS [48]. The +28 Da mass adduct was nearly exclusively found for protocols in which formic acid was used during solid-phase extraction, confirming that yeast (at the given growth conditions), showed hardly any double methylation events. Previous studies provided similar findings, thereby highlighting that the proteome analysis outcome can be strongly affected by the use of this reagent [25, 26]. A recent work demonstrated that these unwanted modifications can be largely avoided by processing the samples at low temperatures [25]. Another interesting observation in regard to solid-phase extraction was that the number of ammonium adductions (+17 Da) was hardly impacted by the nature of the buffers used to elute the peptides from the solid-phase extraction cartridges. Those adducts were supposedly carried over from the ammonium bicarbonate buffers, used for proteolytic digestion.

For the samples prepared with the alternative filter-aided protocols, a number of mass shifts were observed that were detected at a much lesser frequency in samples prepared by in-solution digestion (e.g., one protocol: +41.03, 42.00 or both protocols: -89.05, 11.0 and -2.0). On the other hand (albeit at low frequency), a series of mass modifications such as -119.0, -72.0, 11.98, 12.0, 42.0, 125.07, 128.07, 156.09 and 183.03 were increased or exclusively observed, when using filter-aided protocols.



**1 Considerable variations in the fraction of overall**  
**2 identified spectra observed for the different sample**  
**3 preparation protocols.** The number of identified MS/MS  
 4 spectra for each sample was determined by combining  
 5 identifications from TagGraph, PEAKS database search and  
 6 the sugar oxonium ion fragment search. First, the spectra  
 7 were *de novo* sequenced, where a fraction of all spectra (2.6  
 8 % and 3.8%, on average, for replicates 1 and 2, respectively)  
 9 did not provide any *de novo* spectra, which were further  
 10 allocated to the ‘unsequenced’ category (‘no ALC score’,  
 11 Figure 6, Supplemental Table S6). The *de novo* sequences  
 12 were then used to perform an unrestricted peptide  
 13 (modification) search using TagGraph, which resulted in the  
 14 identification of 28% and 26% of unmodified and 17% and  
 15 14% of modified peptides, on average, for replicates 1 and  
 16 2, respectively (at a 1% peptide FDR). Moreover, PEAKS  
 17 was used as an additional/orthogonal search engine to  
 18 maximise identifications of unmodified peptides. Thereby,  
 19 the number of confidently identified peptides considerably  
 20 increased to 20% and 22%, on average, for replicates 1 and  
 21 2, respectively. Because different search engines employ  
 22 individual approaches and scoring matrices, a combination  
 23 of multiple search engines typically achieves significantly  
 24 more matches [5, 7, 74–79]. The PEAKS database  
 25 (PEAKS-DB) is a hybrid approach that combines elements  
 26 of *de novo* sequencing (short sequence tag extraction) and  
 27 database searching [80]. TagGraph, contrarily, is an  
 28 unrestricted *de novo* sequence-tag approach employing fast  
 29 string-based searches followed by a probabilistic validation  
 30 model optimised for the identification of modified peptides  
 31 [41]. Furthermore, spectra were screened for known  
 32 carbohydrate fragments, which indicate a glycopeptide  
 33 spectrum that would likely remain unidentified by any of  
 34 the above-employed approaches and, therefore, were  
 35 allocated to the category ‘sugars’ (0.8% and 0.6%, on  
 36 average, for replicates 1 and 2, respectively). Finally, the  
 37 remainder of the *de novo* sequences that could not be  
 38 allocated to one of the aforementioned categories were  
 39 categorised as ‘unidentified’. Here, approximately 31 and  
 40 34% remained unidentified for replicates 1 and 2,  
 41 respectively.

42 As mentioned above, small differences in the identification  
 43 rates between the two biological replicates were observed,  
 44 presumably due to operational performance differences of  
 45 the mass spectrometer at the different time periods. Still, a  
 46 very similar pattern in allocation of the sequencing spectra  
 47 is observed between the replicates (Figure 6). Expectedly,  
 48 protocols 6 (methanol quenching), 8 (TCA precipitation)  
 49 and 14 (FASP with SDS buffer) resulted in the lowest  
 50 number of spectral identifications due to possible protein  
 51 aggregation and following losses of protein during

52 precipitation and LC-MS/MS incompatibility of reagents,  
 53 respectively. Furthermore, the number of additional  
 54 identifications with PEAKS-DB was considerably lower  
 55 than for the other protocols when the samples were  
 56 quenched with methanol. Conversely, a higher number of  
 57 spectra from potential glycopeptides was observed using  
 58 this protocol. This observation might be explained by the  
 59 slightly increased fraction of membrane proteins (Figure 3),  
 60 when using this protocol (number 6). The other protocols  
 61 resulted in highly similar profiles and identification rates,  
 62 with few exceptions. A considerably lower number of  
 63 modified peptides was found for protocols 10 (no  
 64 alkylation) and 13 (FASP, Urea). As speculated in the  
 65 previous paragraph, this presumably results from the loss of  
 66 cysteine-containing peptides, and acetone induced  
 67 modifications for protocols 10 and 13. Finally, sample 13  
 68 (FASP with Urea buffer) resulted in one of the highest  
 69 identification rates with a relatively low number of modified  
 70 peptides. Nevertheless, a large fraction of all spectra  
 71 remained unidentified.

## 72 Investigating ‘the nature of the unidentified fraction’.

73 As also observed in other studies [1, 2], approximately one  
 74 third of the MS/MS spectra remained unidentified in the  
 75 current study across all protocols. Recurrently, protocols 6,  
 76 8 and 14 led to a significantly higher fraction of unidentified  
 77 spectra, on average, 44%, 54% and 45%, respectively.  
 78 Other protocols obtained similar results, ranging from 30–  
 79 35% unidentified scans. Protocol 7 (in-solution, IAA)  
 80 resulted in the highest number of identified spectra (70%),  
 81 showcasing the key role of the type of protocol used on the  
 82 identification rate. The inability to identify spectra can have  
 83 various causes, such as impurities (or contaminations) in the  
 84 sample, excessive co-fragmentation, poor quality spectra,  
 85 unexpected modifications or peptide sequences not covered  
 86 by the database (e.g., sequence variants and microbial  
 87 impurities). First, the taxonomic purity of the samples was  
 88 confirmed by a recently published *de novo* metaproteomic  
 89 profiling approach [40], in order to exclude the presence of  
 90 sample carry-over from foregoing analyses and to exclude  
 91 the presence of bacterial contaminants. This was performed  
 92 with protocol 13 for both biological replicates, for which no  
 93 impurities could be identified (data not shown), confirming  
 94 that no carry-over took place and that the yeast cultures  
 95 were of highest purity.

96 A high quality of the fragmentation spectra is a prerequisite  
 97 for confident peptide spectrum matching. Therefore, we  
 98 assessed the quality by *de novo* sequencing and the  
 99 associated average local confidence score (ALC), as  
 100 determined by PEAKS [39]. In general, peptides with  
 101 higher ALC scores indicate a more complete peptide  
 102

fragment ion coverage and, therefore, are expected to have a higher chance of correct identification. As example, the ALC scores of the (un)identified spectra of biological replicate 1 processed with protocol 13 is visualised in Figure 7 (Supplemental Table S6). The ALC distribution is, as expected, very different for the fraction of identified and unidentified spectra. The ALC scores of the unidentified spectra spread predominantly around low numbers (where all identified spectra show very high ALC scores), suggesting that reduced quality (peptide fragment ion coverage) is the main reason for the lack of identification. Nevertheless, a small fraction of the unidentified spectra showed high ALC scores. Most of the *de novo* sequences were close to sequences in the yeast protein sequence database and may therefore represent sequence variants (e.g., single nucleotide polymorphisms SNPs, or isoform- and allele-specific variants of proteins) or additional peptide modifications, which were not covered by the database or could not even be identified by the open modification search approach. Furthermore, peptides containing unexpected semi-tryptic or nonspecific cleavages may also add to this fraction [21].

## CONCLUSION

Our systematic study on the unicellular organism yeast demonstrates the strong impact of several elements within sample preparation protocols, on various aspects of the proteomics analysis outcome. The total number of obtained peptide spectrum matches ranged from approx.  $1 \times 10^4$  to  $3 \times 10^4$ , the proteome coverage ranged from below 15% to approx. 30%, and the overall matched spectra varied in the range from approx. 50 to 70%. The depth of the proteome coverage was heavily affected by the sample quenching protocol, where cells arrested by TCA resulted in a higher number of protein identifications compared to methanol-arrested cells. Furthermore, filter-aided procedures, when combined with Urea, outperformed other protocols in terms of the number of protein identifications.

The use of unrestricted modification search moreover enabled to examine for reagent-induced peptide modifications. The overall frequency of reagent-specific modifications was for some protocols significantly lower (particularly for protocols 8 and 14), albeit that also correlated with the lower number of spectra and decreased total ion current (TIC) observed for those protocols. Our analysis confirmed previously identified sample processing induced modifications, but also revealed unexpected modifications, such as those related to acetone, alkylating agents as well as filter materials.

Approximately 70% of the overall acquired MS/MS spectra could be identified when using filter-aided as well as the best performing in-solution protocols. The unidentified spectra were predominantly of low-quality, lacking

sufficient peptide fragment coverage for a confident identification. A maximum proteome coverage and reduced number of reagent-induced modifications were obtained for the filter-aided approach, even in the presence of Urea buffer (when using moderate incubation temperatures). However, this approach appeared to be more laborious and requires the availability of suitable filters and centrifuges. A comparable performance was obtained with the best performing in-solution protocols, such as 7 and 11. More specialised protocols, such as S-trap [81] and ultrasonic FASP digestion [82] were not evaluated, but are expected to enable a similarly good proteome coverage at reduced processing times.

Ultimately, we systematically evaluated a matrix of sample preparation protocols for the unicellular model eukaryote yeast, and provide a large resource of protocols and associated mass spectrometric raw data. These enable the selection of suitable sample preparation elements, the design of more specialised procedures and support the evaluation and analysis of (native) peptide modifications in yeast.

## AUTHOR INFORMATION

**\*Corresponding Author:** Delft University of Technology, Department of Biotechnology, van der Maasweg 9, 2629 HZ Delft, The Netherlands. E-mail: m.pabst@tudelft.nl.

## Author Contributions

MP, PDL and MDR designed the experiments. MDR, EK and WB performed experiments. MDR and MP analyzed the data. MDR and MP wrote the manuscript. All authors have given approval to the final version of the manuscript.

## Notes

This work was supported by a TU Delft startup fund. Conflict of interest—The authors declare no competing interests.

## ACKNOWLEDGMENT

The authors are grateful to valuable discussions with their colleagues from the department of Biotechnology and acknowledge Carol de Ram for technical support.

## REFERENCES

1. Chick, J.M., Kolippakkam, D., Nusinow, D.P., Zhai, B., Rad, R., Huttlin, E.L., Gygi, S.P.: A mass-tolerant database search identifies a large proportion of unassigned spectra in shotgun proteomics as modified peptides. 33, (2015). <https://doi.org/10.1038/nbt.3267>
2. Griss, J., Perez-Riverol, Y., Lewis, S., Tabb, D.L., Dianes, J.A., Del-Toro, N., Rurik, M., Walzer, M., Kohlbacher, O., Hermjakob, H., Wang, R., Vizcano, J.A.: Recognizing millions of consistently unidentified

- spectra across hundreds of shotgun proteomics datasets. *Nat. Methods*. 13, 651–656 (2016). <https://doi.org/10.1038/nmeth.3902>
3. Ning, K., Fermin, D., Nesvizhskii, A.I.: Computational analysis of unassigned high-quality MS/MS spectra in proteomic data sets. *Proteomics*. 10, 2712–2718 (2010). <https://doi.org/10.1002/pmic.200900473>
4. Nesvizhskii, A.I., Roos, F.F., Grossmann, J., Vogelzang, M., Eddes, J.S., Gruissem, W., Baginsky, S., Aebersold, R.: Dynamic spectrum quality assessment and iterative computational analysis of shotgun proteomic data: Toward more efficient identification of post-translational modifications, sequence polymorphisms, and novel peptides. *Mol. Cell. Proteomics*. 5, 652–670 (2006). <https://doi.org/10.1074/mcp.M500319-MCP200>
5. Tu, C., Sheng, Q., Li, J., Ma, D., Shen, X., Wang, X., Shyr, Y., Yi, Z., Qu, J.: Optimization of search engines and postprocessing approaches to maximize peptide and protein identification for high-resolution mass data. *J. Proteome Res.* 14, 4662–4673 (2015). <https://doi.org/10.1021/acs.jproteome.5b00536>
6. Shteynberg, D., Nesvizhskii, A.I., Moritz, R.L., Deutsch, E.W.: Combining results of multiple search engines in proteomics. *Mol. Cell. Proteomics*. 12, 2383–2393 (2013). <https://doi.org/10.1074/mcp.R113.027797>
7. Yu, W., Taylor, J.A., Davis, M.T., Bonilla, L.E., Lee, K.A., Auger, P.L., Farnsworth, C.C., Welcher, A.A., Patterson, S.D.: Maximizing the sensitivity and reliability of peptide identification in large-scale proteomic experiments by harnessing multiple search engines. *Proteomics*. 10, 1172–1189 (2010). <https://doi.org/10.1002/pmic.200900074>
8. Piehowski, P.D., Petyuk, V.A., Orton, D.J., Xie, F., Moore, R.J., Ramirez-Restrepo, M., Engel, A., Lieberman, A.P., Albin, R.L., Camp, D.G., Smith, R.D., Myers, A.J.: Sources of technical variability in quantitative LC-MS proteomics: Human brain tissue sample analysis. *J. Proteome Res.* 12, 2128–2137 (2013). <https://doi.org/10.1021/pr301146m>
9. Carapito, C., Klemm, C., Aebersold, R., Domon, B.: Systematic LC-MS Analysis of Labile Post-Translational Modifications in Complex Mixtures. 2608–2614 (2009)
10. Grassl, J., Westbrook, J.A., Robinson, A., Borén, M., Dunn, M.J., Clyne, R.K.: Preserving the yeast proteome from sample degradation. *Proteomics*. 9, 4616–4626 (2009). <https://doi.org/10.1002/pmic.200800945>
11. Kanshin, E., Tyers, M., Thibault, P.: Sample Collection Method Bias Effects in Quantitative Phosphoproteomics. *J. Proteome Res.* 14, 2998–3004 (2015). <https://doi.org/10.1021/acs.jproteome.5b00404>
12. Müller, T., Winter, D.: Systematic Evaluation of Protein Reduction and Alkylation Reveals Massive Unspecific Side Effects by Iodine-containing Reagents. *Mol. Cell. Proteomics*. 16, 1173–1187 (2017). <https://doi.org/10.1074/mcp.m116.064048>
13. Suttapitugsakul, S., Xiao, H., Smeekens, J., Wu, R.: Evaluation and optimization of reduction and alkylation methods to maximize peptide identification with MS-based proteomics. *Mol. Biosyst.* 13, 2574–2582 (2017). <https://doi.org/10.1039/c7mb00393e>
14. Güray, M.Z., Zheng, S., Doucette, A.A., Niu, L., Zhang, H., Wu, Z., Wang, Y., Liu, H., Wu, X., Wang, W., Simpson, D.M., Beynon, R.J., Jiang, L., He, L., Fountoulakis, M.: Mass Spectrometry of Intact Proteins Reveals +98 u Chemical Artifacts Following Precipitation in Acetone. *J. Proteome Res.* 16, 444–450 (2018). <https://doi.org/10.1021/acs.jproteome.6b00841>
15. Santa, C., Anjo, S.I., Manadas, B.: Protein precipitation of diluted samples in SDS-containing buffer with acetone leads to higher protein recovery and reproducibility in comparison with TCA/acetone approach. *Proteomics*. 16, 1847–1851 (2016). <https://doi.org/10.1002/pmic.201600024>
16. Jiang, L., He, L., Fountoulakis, M.: Comparison of protein precipitation methods for sample preparation prior to proteomic analysis. *J. Chromatogr. A*. 1023, 317–320 (2004). <https://doi.org/10.1016/j.chroma.2003.10.029>
17. Simpson, D.M., Beynon, R.J.: Acetone precipitation of proteins and the modification of peptides. *J. Proteome Res.* 9, 444–450 (2010). <https://doi.org/10.1021/pr900806x>
18. Crowell, A.M.J., Wall, M.J., Doucette, A.A.: Maximizing recovery of water-soluble proteins through acetone precipitation. *Anal. Chim. Acta*. 796, 48–54 (2013). <https://doi.org/10.1016/j.aca.2013.08.005>
19. Wiśniewski, J.R., Zougman, A., Nagaraj, N., Mann, M.: Universal sample preparation method for proteome analysis. *Nat. Methods*. 6, 359–362 (2009). <https://doi.org/10.1038/nmeth.1322>
20. Manza, L.L., Stamer, S.L., Ham, A.J.L., Codreanu, S.G., Liebler, D.C.: Sample preparation and digestion for proteomic analyses using spin filters. *Proteomics*. 5, 1742–1745 (2005). <https://doi.org/10.1002/pmic.200401063>
21. Lin, Z., Ren, Y., Shi, Z., Zhang, K., Yang, H., Liu, S., Hao, P.: Evaluation and minimization of nonspecific tryptic cleavages in proteomic sample preparation. *Rapid Commun. Mass Spectrom.* 34, (2020). <https://doi.org/10.1002/rcm.8733>
22. Cañas, B., Piñeiro, C., Calvo, E., López-Ferrer, D., Gallardo, J.M.: Trends in sample preparation for classical and second generation proteomics. *J. Chromatogr. A*. 1153, 235–258 (2007). <https://doi.org/10.1016/j.chroma.2007.01.045>
23. Klont, F., Bras, L., Wolters, J.C., Ongay, S., Bischoff, R., Halmos, G.B., Horvatovich, P.: Assessment of Sample Preparation Bias in Mass Spectrometry-Based Proteomics. *Anal. Chem.* 90, 5405–5413 (2018). <https://doi.org/10.1021/acs.analchem.8b00600>
24. Jiang, T., Zhou, X., Taghizadeh, K., Dong, M., Dedon, P.C.: N-formylation of lysine in histone proteins as a secondary modification arising from oxidative DNA damage. *Proc. Natl. Acad. Sci.* 104, 60–65 (2007). <https://doi.org/10.1073/pnas.0606775103>
25. Lenčo, J., Khalikova, M.A., Švec, F.: Dissolving Peptides in 0.1% Formic Acid Brings Risk of Artificial Formylation. *J. Proteome Res.* 19, 993–999 (2020). <https://doi.org/10.1021/acs.jproteome.9b00823>
26. Zheng, S., Doucette, A.A.: Preventing N- and O-formylation of proteins when incubated in concentrated formic acid. *Proteomics*. 16, 1059–1068 (2016). <https://doi.org/10.1002/pmic.201500366>
27. Kollipara, L., Zahedi, R.P.: Protein carbamylation: In vivo modification or in vitro artefact? *Proteomics*. 13, 941–944 (2013). <https://doi.org/10.1002/pmic.201200452>
28. Boja, E.S., Fales, H.M.: Overalkylation of a protein digest with iodoacetamide. *Anal. Chem.* 73, 3576–3582 (2001). <https://doi.org/10.1021/ac0103423>
29. Kuznetsova, K.G., Levitsky, L.I., Pyatnitskiy, M.A., Ilina, I.Y., Bubis, J.A., Solovyeva, E.M., Zgoda, V.G., Gorshkov, M. V., Moshkovskii, S.A.: Cysteine alkylation methods in shotgun proteomics and their possible effects on methionine residues. *J. Proteomics*. 231, 104022 (2021). <https://doi.org/10.1016/j.jprot.2020.104022>
30. Wiśniewski, J.R., Zettl, K., Pilch, M., Rysiewicz, B., Sadok, I.: ‘Shotgun’ proteomic analyses without alkylation of cysteine. *Anal. Chim. Acta*. 1100, 131–137 (2020). <https://doi.org/10.1016/j.aca.2019.12.007>
31. Liu, S., Zhang, C., Campbell, J.L., Zhang, H., Yeung, K.K., Han, V.K.M., Lajoie, G.A.: Formation of phosphopeptide-metal ion complexes in liquid chromatography / electrospray mass spectrometry and their influence on phosphopeptide detection. 2747–2756 (2005). <https://doi.org/10.1002/rcm.2105>
32. Hao, P., Ren, Y., Alpert, A.J., Sze, S.K.: Detection, Evaluation and Minimization of Nonenzymatic Deamidation in Proteomic Sample Preparation. *Mol. Cell. Proteomics*. 10, O111.009381 (2011). <https://doi.org/10.1074/mcp.o111.009381>
33. Purwaha, P., Silva, L.P., Hawke, D.H., Weinstein, J.N., Lorenzi, P.L.: An artifact in LC-MS/MS measurement of glutamine and glutamic acid: In-source cyclization to pyroglutamic acid. *Anal. Chem.* 86, 5633–5637 (2014). <https://doi.org/10.1021/ac501451v>
34. Stadtman, E.R., Van Remmen, H., Richardson, A., Wehr, N.B., Levine, R.L.: Methionine oxidation and aging. *Biochim. Biophys. Acta - Proteins Proteomics*. 1703, 135–140 (2005). <https://doi.org/10.1016/j.bbapap.2004.08.010>
35. Entian, K.-D., Köter, P.: 25 Yeast Genetic Strain and Plasmid Collections. *Methods Microbiol.* 36, 629–666 (2007). [https://doi.org/10.1016/S0580-9517\(06\)36025-4](https://doi.org/10.1016/S0580-9517(06)36025-4)
36. Solis-Escalante, D., Kuijpers, N.G.A., Barrajon-Simancas, N., van den Broek, M., Pronk, J.T., Daran, J.M., Daran-Lapujade, P.: A Minimal set of glycolytic genes reveals strong redundancies in



- 1 saccharomyces cerevisiae central metabolism. *Eukaryot. Cell.* 14, 804–816
- 2 (2015). <https://doi.org/10.1128/EC.00064-15>
- 3 37. Verduyn, C., Postma, E., Scheffers, W.A., Van Dijken, J.P.: Effect of benzoic acid on metabolic fluxes in yeasts: A continuous-culture
- 4 study on the regulation of respiration and alcoholic fermentation. *Yeast.* 8,
- 5 501–517 (1992). <https://doi.org/10.1002/yea.320080703>
- 6 38. Köcher, T., Pichler, P., Swart, R., Mechtler, K.: Analysis of
- 7 protein mixtures from whole-cell extracts by single-run nanolc-ms/ms
- 8 using ultralong gradients. *Nat. Protoc.* 7, 882–890 (2012). <https://doi.org/10.1038/nprot.2012.036>
- 9 39. Ma, B., Zhang, K., Hendrie, C., Liang, C., Li, M., Doherty-
- 10 Kirby, A., Lajoie, G.: PEAKS: Powerful software for peptide de novo
- 11 sequencing by tandem mass spectrometry. *Rapid Commun. Mass*
- 12 *Spectrom.* 17, 2337–2342 (2003). <https://doi.org/10.1002/rcm.1196>
- 13 40. Kleikamp, H.B.C., Pronk, M., Tugui, C., Guedes da Silva, L.,
- 14 Abbas, B., Lin, Y.M., van Loosdrecht, M.C.M., Pabst, M.: Database-
- 15 independent de novo metaproteomics of complex microbial communities.
- 16 *Cell Syst.* 12, 375–383.e5 (2021). <https://doi.org/10.1016/j.cels.2021.04.003>
- 17 41. Devabhaktuni, A., Lin, S., Zhang, L., Swaminathan, K.,
- 18 Gonzalez, C.G., Olsson, N., Pearlman, S.M., Rawson, K., Elias, J.E.: TagGraph reveals vast protein modification landscapes from large tandem
- 19 mass spectrometry datasets. *Nat. Biotechnol.* 37, (2019). <https://doi.org/10.1038/s41587-019-0067-5>
- 20 42. Mellacheruvu, D., Wright, Z., Couzens, A.L., Lambert, J.P., St-
- 21 Denis, N.A., Li, T., Miteva, Y. V., Hauri, S., Sardiu, M.E., Low, T.Y.,
- 22 Halim, V.A., Bagshaw, R.D., Hubner, N.C., Al-Hakim, A., Bouchard, A.,
- 23 Faubert, D., Fermin, D., Dunham, W.H., Goudreault, M., Lin, Z.Y.,
- 24 Badillo, B.G., Pawson, T., Durocher, D., Coulombe, B., Aebersold, R.,
- 25 Superti-Furga, G., Colinge, J., Heck, A.J.R., Choi, H., Gstaiger, M.,
- 26 Mohammed, S., Cristea, I.M., Bennett, K.L., Washburn, M.P., Raught, B.,
- 27 Ewing, R.M., Gingras, A.C., Nesvizhskii, A.I.: The CRAPome: A
- 28 contaminant repository for affinity purification-mass spectrometry data.
- 29 *Nat. Methods.* 10, 730–736 (2013). <https://doi.org/10.1038/nmeth.2557>
- 30 43. Chambers, M.C., MacLean, B., Burke, R., Amodei, D.,
- 31 Ruderman, D.L., Neumann, S., Gatto, L., Fischer, B., Pratt, B., Egerton,
- 32 J., Hoff, K., Kessner, D., Tasman, N., Shulman, N., Frewen, B., Baker,
- 33 T.A., Brusniak, M.Y., Paulse, C., Creasy, D., Flashner, L., Kani, K.,
- 34 Moulding, C., Seymour, S.L., Nuwaysir, L.M., Lefebvre, B., Kuhlmann,
- 35 F., Roark, J., Rainer, P., Detlev, S., Hemenway, T., Huhmer, A., Langridge,
- 36 J., Connolly, B., Chadick, T., Holly, K., Eckels, J., Deutsch, E.W., Moritz,
- 37 R.L., Katz, J.E., Agus, D.B., MacCoss, M., Tabb, D.L., Mallick, P.: A
- 38 cross-platform toolkit for mass spectrometry and proteomics. *Nat.*
- 39 *Biotechnol.* 30, 918–920 (2012). <https://doi.org/10.1038/nbt.2377>
- 40 44. Pabst, M., Grouzdev, D., Lawson, C.E., Kleikamp, H.B.C., de
- 41 Ram, C., Louwen, R., Lin, Y., Lückner, S., van Loosdrecht, M.C.M.,
- 42 Laureni, M.: A general approach to explore prokaryotic protein
- 43 glycosylation reveals the unique surface layer modulation of an anammox
- 44 bacterium. *ISME J.* (2021). <https://doi.org/10.1038/s41396-021-01073-y>
- 45 45. Van Rossum, G., & Drake, F.L.: Python 3 Reference Manual.
- 46 CreateSpace. (2009)
- 47 46. Carbon, S., Douglass, E., Good, B.M., Unni, D.R., Harris, N.L.,
- 48 Mungall, C.J., Basu, S., Chisholm, R.L., Dodson, R.J., Hartline, E., Fey,
- 49 P., Thomas, P.D., Albou, L.P., Ebert, D., Kesling, M.J., Mi, H.,
- 50 Muruganujan, A., Huang, X., Mushayahama, T., LaBonte, S.A., Siegele,
- 51 D.A., Antonazzo, G., Attrill, H., Brown, N.H., Garapati, P., Marygold, S.J.,
- 52 Trovisco, V., dos Santos, G., Falls, K., Tabone, C., Zhou, P., Goodman,
- 53 J.L., Strelets, V.B., Thurmond, J., Garmiri, P., Ishtiaq, R., Rodríguez-
- 54 López, M., Acencio, M.L., Kuiper, M., Lægread, A., Logie, C., Lovering,
- 55 R.C., Kramarz, B., Saverimuttu, S.C.C., Pinheiro, S.M., Gunn, H., Su, R.,
- 56 Thurlow, K.E., Chibucos, M., Giglio, M., Nadendla, S., Munro, J.,
- 57 Jackson, R., Duesbury, M.J., Del-Toro, N., Meldal, B.H.M., Paneerselvam,
- 58 K., Perfetto, L., Porras, P., Orchard, S., Shrivastava, A., Chang, H.Y., Finn,
- 59 R.D., Mitchell, A.L., Rawlings, N.D., Richardson, L., Sangrador-Vegas,
- 60 A., Blake, J.A., Christie, K.R., Dolan, M.E., Drabkin, H.J., Hill, D.P., Ni,
- 61 L., Sitnikov, D.M., Harris, M.A., Oliver, S.G., Rutherford, K., Wood, V.,
- 62 Hayles, J., Bähler, J., Bolton, E.R., de Pons, J.L., Dwinell, M.R., Hayman,
- 63 G.T., Kaldunski, M.L., Kwitek, A.E., Lalederkind, S.J.F., Plasterer, C.,
- 64 Tutaj, M.A., Vedi, M., Wang, S.J., D'Eustachio, P., Matthews, L., Balhoff,
- 65 J.P., Aleksander, S.A., Alexander, M.J., Cherry, J.M., Engel, S.R.,
- 66 Gondwe, F., Karra, K., Miyasato, S.R., Nash, R.S., Simison, M., Skrzypek,
- 67 M.S., Weng, S., Wong, E.D., Feuermann, M., Gaudet, P., Morgat, A.,
- 68 Bakker, E., Berardini, T.Z., Reiser, L., Subramaniam, S., Huala, E., Arighi,
- 69 C.N., Auchincloss, A., Axelsen, K., Argoud-Puy, G., Bateman, A., Blatter,
- 70 M.C., Boutet, E., Bowler, E., Breuza, L., Bridge, A., Britto, R., Bye-A-Jee,
- 71 H., Casas, C.C., Coudert, E., Denny, P., Es-Treicher, A., Famiglietti, M.L.,
- 72 Georghiou, G., Gos, A.N., Gruaz-Gumowski, N., Hatton-Ellis, E., Hulo,
- 73 C., Ignatchenko, A., Jungo, F., Laiho, K., Le Mercier, P., Lieberherr, D.,
- 74 Lock, A., Lussi, Y., MacDougall, A., Ma-Grane, M., Martin, M.J., Masson,
- 75 P., Natale, D.A., Hyka-Nouspikel, N., Orchard, S., Pedruzzi, I., Pourcel,
- 76 L., Poux, S., Pundir, S., Rivoire, C., Speretta, E., Sundaram, S., Tyagi, N.,
- 77 Warner, K., Zaru, R., Wu, C.H., Diehl, A.D., Chan, J.N., Grove, C., Lee,
- 78 R.Y.N., Muller, H.M., Raciti, D., van Aken, K., Sternberg, P.W.,
- 79 Berriman, M., Paulini, M., Howe, K., Gao, S., Wright, A., Stein, L., Howe,
- 80 D.G., Toro, S., Westerfield, M., Jaiswal, P., Cooper, L., Elser, J.: The Gene
- 81 Ontology resource: Enriching a GOLD mine. *Nucleic Acids Res.* 49, D325–
- 82 D334 (2021). <https://doi.org/10.1093/nar/gkaa1113>
- 83 47. Bateman, A.: UniProt: A worldwide hub of protein knowledge.
- 84 *Nucleic Acids Res.* 47, D506–D515 (2019). <https://doi.org/10.1093/nar/gky1049>
- 85 48. Nickerson, J.L., Doucette, A.A.: Rapid and Quantitative Protein
- 86 Precipitation for Proteome Analysis by Mass Spectrometry. *J. Proteome*
- 87 *Res.* 19, 2035–2042 (2020). <https://doi.org/10.1021/acs.jproteome.9b00867>
- 88 49. Pérez-Rodríguez, S., Ramírez, O.T., Trujillo-Roldán, M.A.,
- 89 Valdez-Cruz, N.A.: Comparison of protein precipitation methods for
- 90 sample preparation prior to proteomic analysis of Chinese hamster ovary
- 91 cell homogenates. *Electron. J. Biotechnol.* 48, 86–94 (2020). <https://doi.org/10.1016/j.ejbt.2020.09.006>
- 92 50. Rajalingam, D., Loftis, C., Xu, J.J., Kumar, T.K.S.: Trichloroacetic acid-induced protein precipitation involves the reversible
- 93 association of a stable partially structured intermediate. *Protein Sci.* 18,
- 94 980–993 (2009). <https://doi.org/10.1002/pro.108>
- 95 51. Manadas, B.J., Vougas, K., Fountoulakis, M., Duarte, C.B.: Sample sonication after trichloroacetic acid precipitation increases protein
- 96 recovery from cultured hippocampal neurons, and improves resolution and
- 97 reproducibility in two-dimensional gel electrophoresis. *Electrophoresis.*
- 98 27, 1825–1831 (2006). <https://doi.org/10.1002/elps.200500757>
- 99 52. Lin, Y., Zhou, J., Bi, D., Chen, P., Wang, X., Liang, S.: Sodium-
- 100 deoxycholate-assisted tryptic digestion and identification of proteolytically
- 101 resistant proteins. *Anal. Biochem.* 377, 259–266 (2008). <https://doi.org/10.1016/j.ab.2008.03.009>
- 102 53. Hustoft, H.K., Reubsæet, L., Greibrokk, T., Lundanes, E.,
- 103 Malerød, H.: Critical assessment of accelerating trypsinolysis methods. *J.*
- 104 *Pharm. Biomed. Anal.* 56, 1069–1078 (2011). <https://doi.org/10.1016/j.jpba.2011.08.013>
- 105 54. Scheerlinck, E., Dhaenens, M., Van Soom, A., Peelman, L., De
- 106 Sutter, P., Van Steendam, K., Deforce, D.: Minimizing technical variation
- 107 during sample preparation prior to label-free quantitative mass
- 108 spectrometry. *Anal. Biochem.* 490, 14–19 (2015). <https://doi.org/10.1016/j.ab.2015.08.018>
- 109 55. Canelas, A.B., Ras, C., ten Pierick, A., van Dam, J.C., Heijnen,
- 110 J.J., van Gulik, W.M.: Leakage-free rapid quenching technique for yeast
- 111 metabolomics. *Metabolomics.* 4, 226–239 (2008). <https://doi.org/10.1007/s11306-008-0116-4>
- 112 56. Schmidt, S.A., Jacob, S.S., Ahn, S.B., Rupasinghe, T., Krömer,
- 113 J.O., Khan, A., Varela, C.: Two strings to the systems biology bow: Co-
- 114 extracting the metabolome and proteome of yeast. *Metabolomics.* 9, 173–
- 115 188 (2013). <https://doi.org/10.1007/s11306-012-0437-1>
- 116 57. Ludwig, K.R., Schroll, M.M., Hummon, A.B.: Comparison of
- 117 In-Solution, FASP, and S-Trap Based Digestion Methods for Bottom-Up
- 118 Proteomic Studies. *J. Proteome Res.* 17, 2480–2490 (2018). <https://doi.org/10.1021/acs.jproteome.8b00235>
- 119 58. Tanca, A., Bioss, G., Pagnozzi, D., Addis, M.F., Uzzau, S.: Comparison of detergent-based sample preparation workflows for LTQ-
- 120 Orbitrap analysis of the Escherichia coli proteome. *Proteomics.* 13, 2597–
- 121 2607 (2013). <https://doi.org/10.1002/pmic.201200478>

59. Bennion, B.J., Daggett, V.: The molecular basis for the chemical denaturation of proteins by Urea. *Proc. Natl. Acad. Sci. U. S. A.* 100, 5142–5147 (2003). <https://doi.org/10.1073/pnas.0930122100>
60. Richards, A.L., Merrill, A.E., Coon, J.J.: Proteome sequencing goes deep. *Curr. Opin. Chem. Biol.* 24, 11–17 (2015). <https://doi.org/10.1016/j.cbpa.2014.10.017>
61. Hebert, A.S., Richards, A.L., Bailey, D.J., Ulbrich, A., Coughlin, E.E., Westphall, M.S., Coon, J.J.: The One Hour Yeast Proteome. *Mol. Cell. Proteomics* 13, 339–347 (2014). <https://doi.org/10.1074/mcp.M113.034769>
62. Thakur, S.S., Geiger, T., Chatterjee, B., Bandilla, P., Fröhlich, F., Cox, J., Mann, M.: Deep and highly sensitive proteome coverage by LC-MS/MS without prefractionation. *Mol. Cell. Proteomics* 10, 1–9 (2011). <https://doi.org/10.1074/mcp.M110.003699>
63. Gao, Y., Ping, L., Duong, D., Zhang, C., Dammer, E.B., Li, Y., Chen, P., Chang, L., Gao, H., Wu, J., Xu, P.: Mass-Spectrometry-Based Near-Complete Draft of the *Saccharomyces cerevisiae* Proteome. *J. Proteome Res.* 20, 1328–1340 (2021). <https://doi.org/10.1021/acs.jproteome.0c00721>
64. Li, X., Gerber, S.A., Rudner, A.D., Beausoleil, S.A., Haas, W., Villén, J., Elias, J.E., Gygi, S.P.: Large-scale phosphorylation analysis of ??-factor-arrested *Saccharomyces cerevisiae*. *J. Proteome Res.* 6, 1190–1197 (2007). <https://doi.org/10.1021/pr060559j>
65. Han, G., Ye, M., Zhou, H., Jiang, X., Feng, S., Jiang, X., Tian, R., Wan, D., Zou, H., Gu, J.: Large-scale phosphoproteome analysis of human liver tissue by enrichment and fractionation of phosphopeptides with strong anion exchange chromatography. *Proteomics* 8, 1346–1361 (2008). <https://doi.org/10.1002/pmic.200700884>
66. Swaney, D.L., Wenger, C.D., Coon, J.J.: Value of Using Multiple Proteases for Large-Scale Mass Spectrometry-Based Proteomics research articles. 1323–1329 (2010)
67. Giansanti, P., Tsiatsiani, L., Low, T.Y., Heck, A.J.R.: Six alternative proteases for mass spectrometry-based proteomics beyond trypsin. *Nat. Protoc.* 11, 993–1006 (2016). <https://doi.org/10.1038/nprot.2016.057>
68. Daran-Lapujade, P., Jansen, M.L.A., Daran, J.M., Van Gulik, W., De Winde, J.H., Pronk, J.T.: Role of Transcriptional Regulation in Controlling Fluxes in Central Carbon Metabolism of *Saccharomyces cerevisiae*: A chemostat culture study. *J. Biol. Chem.* 279, 9125–9138 (2004). <https://doi.org/10.1074/jbc.M309578200>
69. Kollipara, L., Zahedi, R.P.: Protein carbamylation: In vivo modification or in vitro artefact? *Proteomics* 13, 941–944 (2013). <https://doi.org/10.1002/pmic.201200452>
70. Sun, S., Zhou, J.Y., Yang, W., Zhang, H.: Inhibition of protein carbamylation in Urea solution using ammonium-containing buffers. *Anal. Biochem.* 446, 76–81 (2014). <https://doi.org/10.1016/j.ab.2013.10.024>
71. Tarasova, I.A., Chumakov, P.M., Moshkovskii, S.A., Gorshkov, M. V.: Profiling modifications for glioblastoma proteome using ultra-tolerant database search: Are the peptide mass shifts biologically relevant or chemically induced? *J. Proteomics* 191, 16–21 (2019). <https://doi.org/10.1016/j.jprot.2018.05.010>
72. Geoghegan, K.F., Hoth, L.R., Tan, D.H., Borzilleri, K.A., Withka, J.M., Boyd, J.G.: Cyclization of N-terminal S-carbamoylmethylcysteine causing loss of 17 Da from peptides and extra peaks in peptide maps. *J. Proteome Res.* 1, 181–187 (2002). <https://doi.org/10.1021/pr025503d>
73. Güray, M.Z., Zheng, S., Doucette, A.A.: Mass Spectrometry of Intact Proteins Reveals +98 u Chemical Artifacts Following Precipitation in Acetone. *J. Proteome Res.* 16, 889–897 (2017). <https://doi.org/10.1021/acs.jproteome.6b00841>
74. Shteynberg, D., Nesvizhskii, A.I., Moritz, R.L., Deutsch, E.W., Tu, C., Sheng, Q., Li, J., Ma, D., Shen, X., Wang, X., Shyr, Y., Yi, Z., Qu, J., Editor, S., Walker, J.M., Yu, W., Taylor, J.A., Davis, M.T., Bonilla, L.E., Lee, K.A., Auger, P.L., Farnsworth, C.C., Welcher, A.A., Patterson, S.D., Searle, B.C., Turner, M., Nesvizhskii, A.I., Dagda, R.K., Sultana, T., Lyons-Weiler, J., Alves, G., Wu, W.W., Wang, G., Shen, R.F., Yu, Y.K., Kwon, T., Choi, H., Vogel, C., Nesvizhskii, A.I., Marcotte, E.M., Agten, A., Van Houtven, J., Askenazi, M., Burzykowski, T., Laukens, K., Valkenburg, D.: Visualizing the agreement of peptide assignments between different search engines. *J. Proteome Res.* 7, 39–47 (2008). <https://doi.org/10.1002/jms.4471>
75. Searle, B.C., Turner, M., Nesvizhskii, A.I.: Improving sensitivity by probabilistically combining results from multiple MS/MS search methodologies. *J. Proteome Res.* 7, 245–253 (2008). <https://doi.org/10.1021/pr070540w>
76. Kwon, T., Choi, H., Vogel, C., Nesvizhskii, A.I., Marcotte, E.M.: MSblender: A probabilistic approach for integrating peptide identifications from multiple database search engines. *J. Proteome Res.* 10, 2949–2958 (2011). <https://doi.org/10.1021/pr2002116>
77. Alves, G., Wu, W.W., Wang, G., Shen, R.F., Yu, Y.K.: Enhancing peptide identification confidence by combining search methods. *J. Proteome Res.* 7, 3102–3113 (2008). <https://doi.org/10.1021/pr700798h>
78. Agten, A., Van Houtven, J., Askenazi, M., Burzykowski, T., Laukens, K., Valkenburg, D.: Visualizing the agreement of peptide assignments between different search engines. *J. Mass Spectrom.* 55, (2020). <https://doi.org/10.1002/jms.4471>
79. Dagda, R.K., Sultana, T., Lyons-Weiler, J.: Evaluation of the consensus of four peptide identification algorithms for Tandem mass spectrometry based proteomics. *J. Proteomics Bioinforma.* 3, 39–47 (2010). <https://doi.org/10.4172/jpb.1000119>
80. Zhang, J., Xin, L., Shan, B., Chen, W., Xie, M., Yuen, D., Zhang, W., Zhang, Z., Lajoie, G.A., Ma, B.: PEAKS DB: De novo sequencing assisted database search for sensitive and accurate peptide identification. *Mol. Cell. Proteomics* 11, 1–8 (2012). <https://doi.org/10.1074/mcp.M111.010587>
81. Hailemariam, M., Eguez, R.V., Singh, H., Bekele, S., Ameni, G., Pieper, R., Yu, Y.: S-Trap, an Ultrafast Sample-Preparation Approach for Shotgun Proteomics. *J. Proteome Res.* 17, 2917–2924 (2018). <https://doi.org/10.1021/acs.jproteome.8b00505>
82. Carvalho, L.B., Capelo-Martínez, J.L., Lodeiro, C., Wiśniewski, J.R., Santos, H.M.: Ultrasonic-Based Filter Aided Sample Preparation as the General Method to Sample Preparation in Proteomics. *Anal. Chem.* 92, 9164–9171 (2020). <https://doi.org/10.1021/acs.analchem.0c01470>

Maxime den Ridder et al., 2022

**Table 1: Matrix of investigated sample preparation protocols (1–14).** Abbreviations: SPE, solid phase extraction; TCA, trichloroacetic acid; SDS, sodium dodecyl sulphate; DTT, Dithiothreitol; TCEP, Tris(2-carboxyethyl)phosphine; IAA, iodoacetamide; AA, acrylamide; TFA, trifluoroacetic acid; FA, formic acid; ABC, ammonium bicarbonate. The detailed protocols are provided in the S.I. materials.

| #  | SAMPLING METHOD | LYSIS BUFFER | REDUCING AGENT | ALKYLATION REAGENT | PROTEIN PURIFICATION | SPE BUFFERS |
|----|-----------------|--------------|----------------|--------------------|----------------------|-------------|
| 1  | TCA             | SDS          | DTT            | IAA                | Acetone              | TFA         |
| 2  | TCA             | SDS          | DTT            | IAA                | Acetone              | FA + ABC    |
| 3  | TCA             | SDS          | DTT            | IAA                | Acetone              | ABC         |
| 4  | TCA             | SDS          | DTT            | IAA                | Acetone              | MeOH        |
| 5  | TCA             | SDS          | DTT            | IAA                | Acetone              | FA          |
| 6  | MeOH            | SDS          | DTT            | IAA                | Acetone              | TFA + ABC   |
| 7  | TCA             | SDS          | DTT            | IAA                | Acetone              | TFA + ABC   |
| 8  | TCA             | SDS          | DTT            | IAA                | TCA                  | TFA + ABC   |
| 9  | TCA             | SDS          | DTT            | AA                 | Acetone              | TFA + ABC   |
| 10 | TCA             | SDS          | DTT            | -                  | Acetone              | TFA + ABC   |
| 11 | TCA             | SDS          | TCEP           | IAA                | Acetone              | TFA + ABC   |
| 12 | TCA             | UREA         | DTT            | IAA                | Acetone              | TFA + ABC   |
| 13 | TCA             | UREA         | DTT            | IAA                | FASP                 | TFA + ABC   |
| 14 | TCA             | SDS          | DTT            | IAA                | FASP                 | TFA + ABC   |



## A. Whole cell lysate sample preparation protocol study

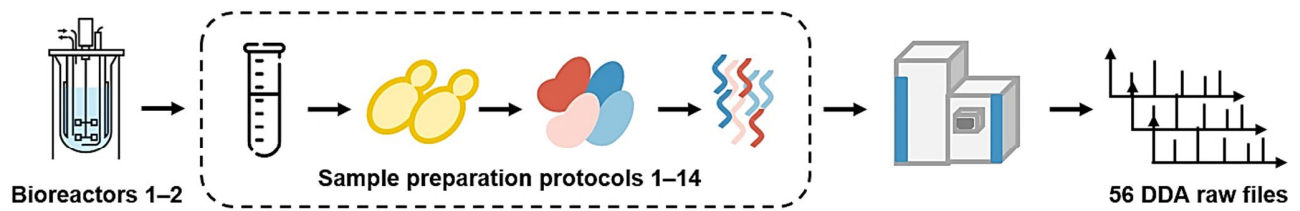

## B. Data processing workflow

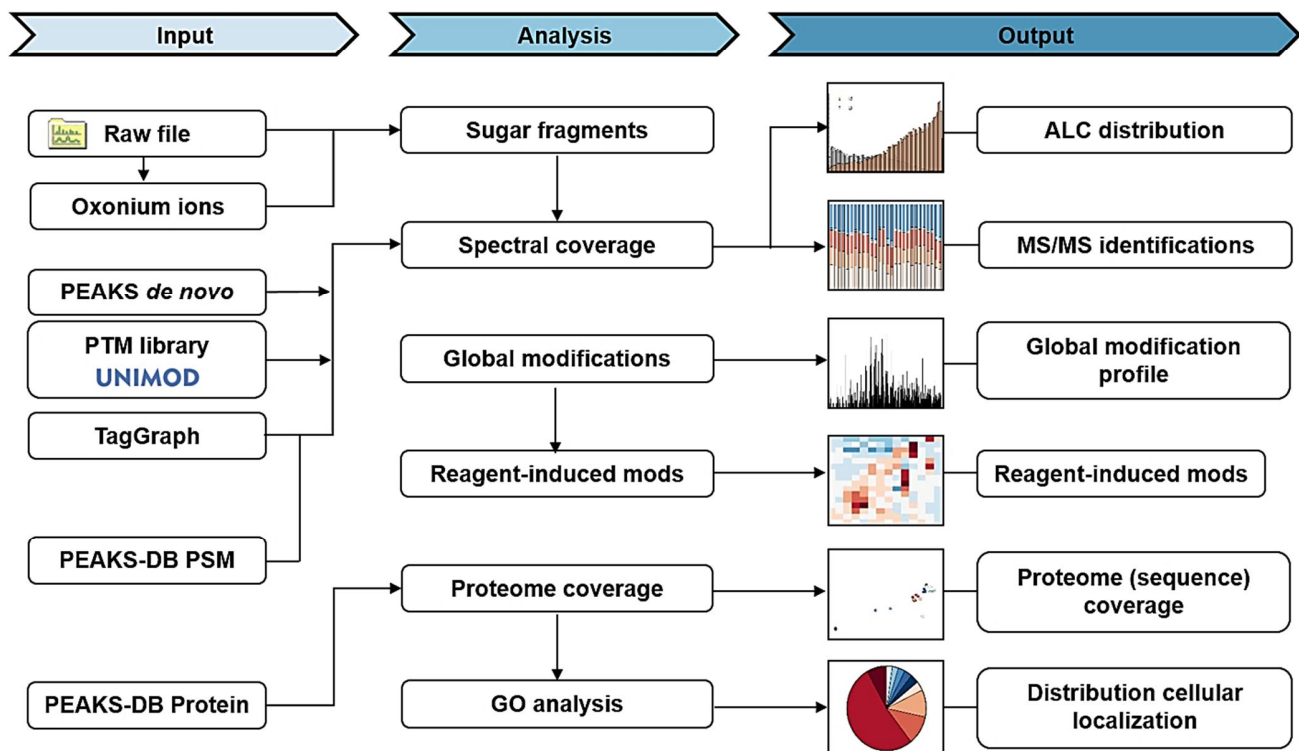

**Figure 1: Whole cell lysate sample preparation study for yeast and established data processing pipeline.** **A.** The employed study performed yeast cultivation in aerobic chemostats, sample collection and quenching, cell lysis by bead beating, protein extraction from cells and subsequent reduction and alkylation of the proteins. Proteins are then concentrated using protein precipitation or a filter-aided approach. Enriched proteins are subsequently digested using Trypsin, where the obtained peptides are subjected to solid phase extraction (SPE) to remove contaminants prior to shotgun proteomic analysis. **B.** The obtained MS/MS spectra were *de novo* sequenced using PEAKS and subsequently identified through database (PEAKS-DB) and unrestricted modification searches (TagGraph). A data analysis pipeline was established to determine the % of identified spectra, spectral quality, proteome and amino acid sequence coverage. Peptides identifications obtained by TagGraph were furthermore used to determine the modification profiles for every protocol. Finally, proteome were annotated with GO-terms to investigate the distribution according to ‘cellular components’.

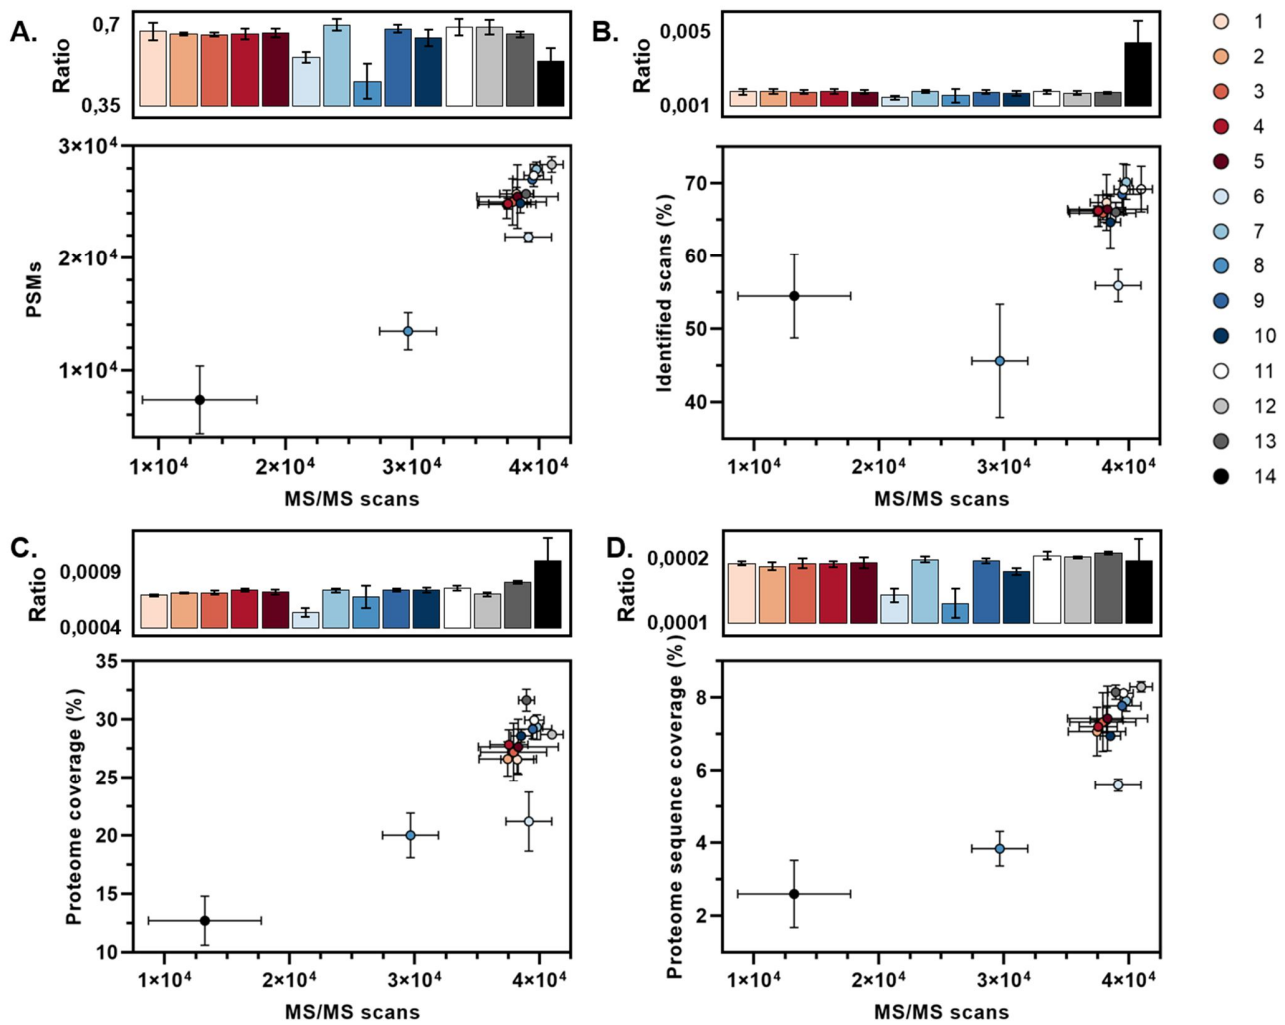

**Figure 2: Achieved % of identified fragmentation spectra, proteome and sequence coverage for the different sample preparation protocols.** The number of Peptide Spectrum Matches (PSMs) (A); identified scans (%) (B); proteome coverage (%) (C) and proteome sequence coverage (D), were plotted against the number of MS/MS scans obtained per protocol. Each coloured circle represents the average of averages of two biological replicates with each 2 technical replicates (2x2), while the standard deviation is represented by the error bars. In addition, the bars depicted above each plot show the ratios of the acquired PSMs, identified scans and proteome (sequence) coverage vs. MS/MS scans for each protocol. The ratios are averages of two biological replicates with each 2 technical replicates (2x2), while the standard deviation is shown as error bars. The proteome coverage was calculated based on the identified proteins per protocol as a percentage of the total number of proteins in yeast (known ORFs). In addition, the proteome sequence coverage was calculated based on the identified amino acids in the proteomics experiments, as a percentage of the total proteome amino acid sequence (sequence coverage).

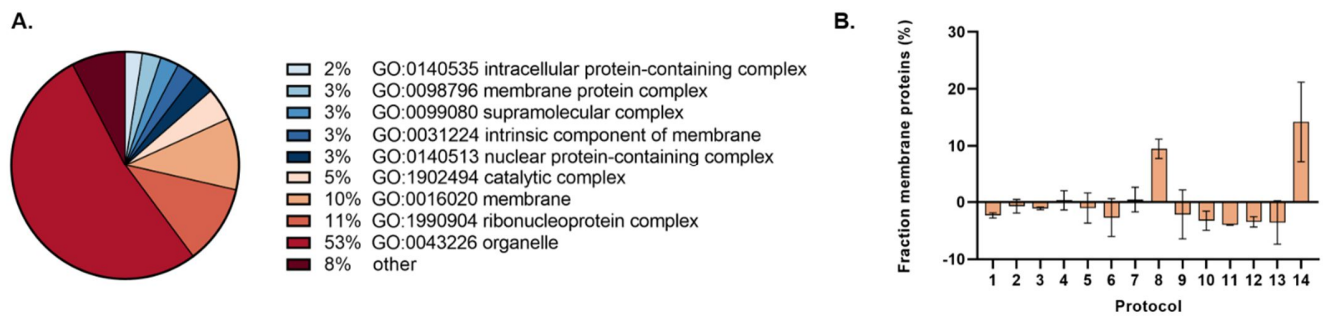

**Figure 3: Distribution of Gene Ontology (GO) terms for identified proteins.** **A)** Based on the classifications of GO annotation, the identified proteins (with at least 2 unique peptides) were categorized into cellular components, which is displayed in the pie chart for protocol 13 (biological replicate 1). Categories with GO terms less than 1% are classified as ‘other’. Here, the average of two biological replicates with each 2 technical replicates (2x2) is shown. **B)** The average fraction of identified membrane proteins across all protocols was 11%. The deviations from the average are shown in percentage for each protocol (1–14).

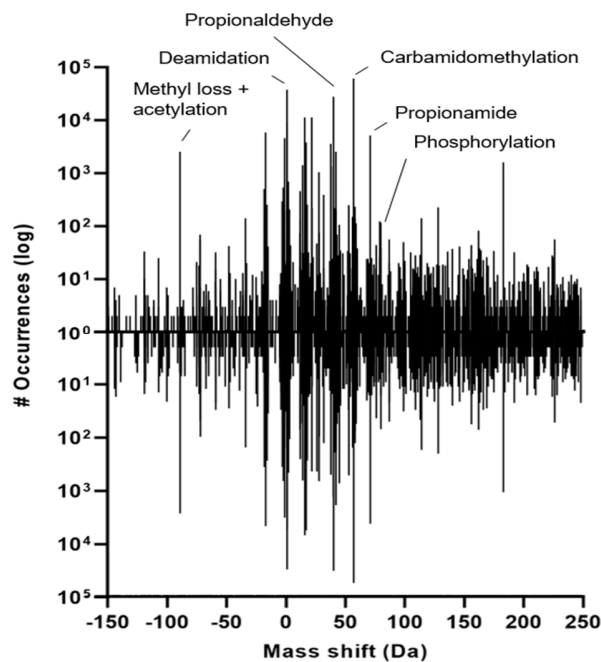

**Figure 4: Sum of observed mass shifts in the different protocols using an unrestricted modification search approach (TagGraph).** The number of occurrences corresponds to the number of peptide spectrum matches containing the mass deviation (log scale) for biological replicate 1 (upper histogram) and 2 (lower histogram). The total of both biological replicates show a highly comparable mass-shift profile.



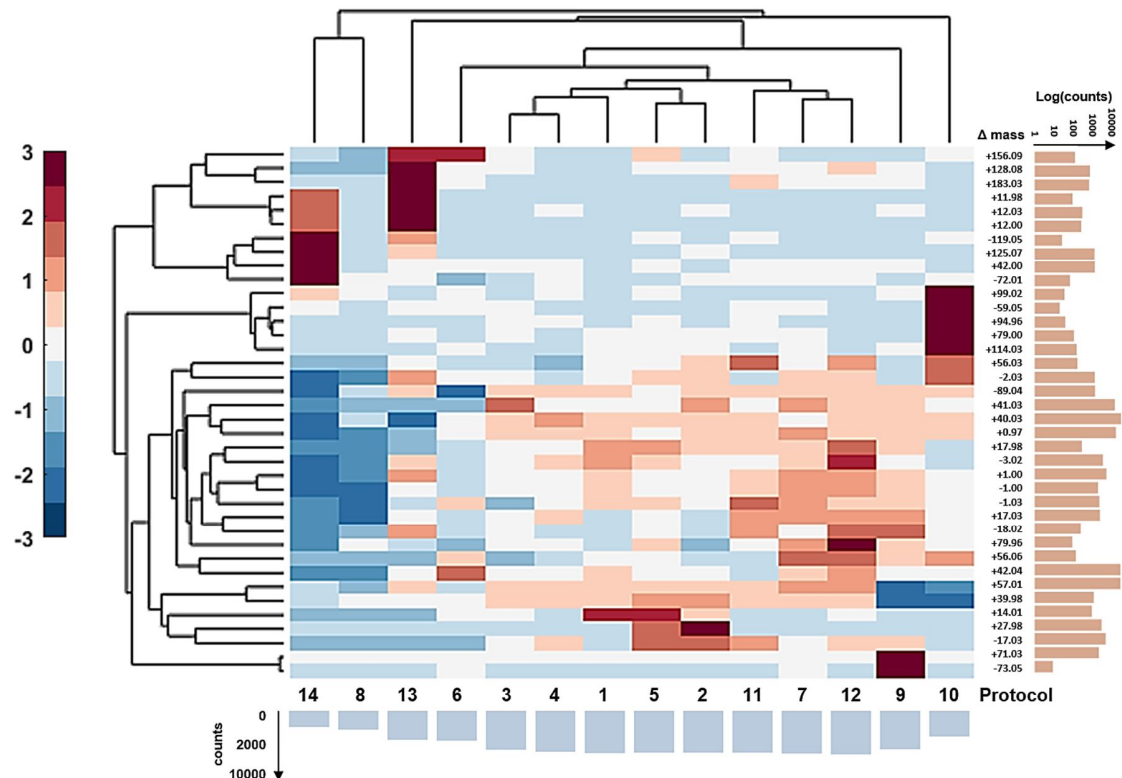

**Figure 5: Clustered heat map of most prominent modifications identified by TagGraph across the different sample preparation protocols.** Dendrogram and standardized clustered heat map of the relative change (%) of mass shifts observed across the sample preparation protocols. The mass shifts found for each protocol originating from each technical and biological replicates (2x2), were averaged per sample and normalized to the number of obtained MS/MS spectra. The bars below the heat map show the total counts of modifications observed for each sample and the bars on the y-axis show the total counts of the respective mass shift (modification) across the investigated samples.

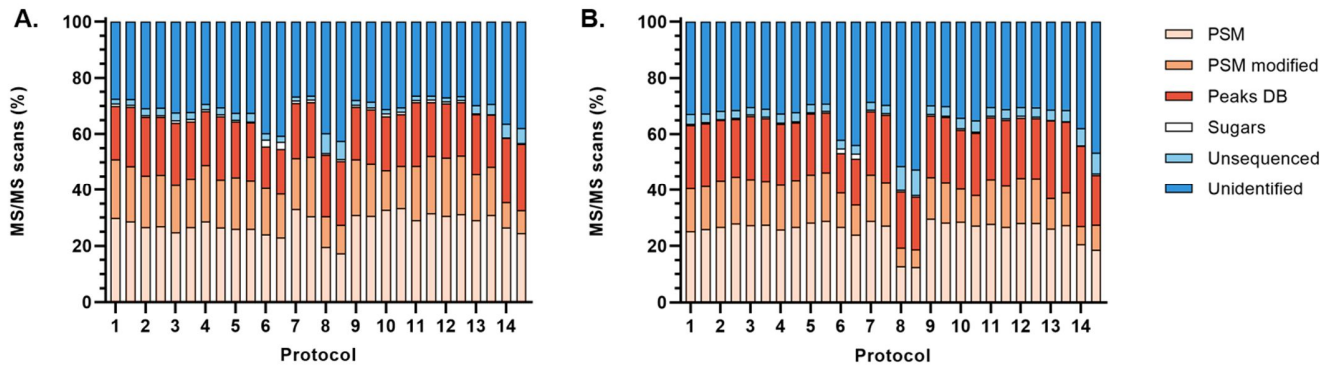

**Figure 6: Overall spectral coverage obtained for the different sample preparation protocols.** Allocation of total number of MS/MS spectra of each sample (1–14) into different categories: PSMs (TagGraph), PSMs modified (TagGraph), identified spectra by second search engine (PEAKS-DB), spectra containing oxonium fragments, ‘unsequenced’ and unidentified spectra for biological replicate 1 (A) and 2 (B).

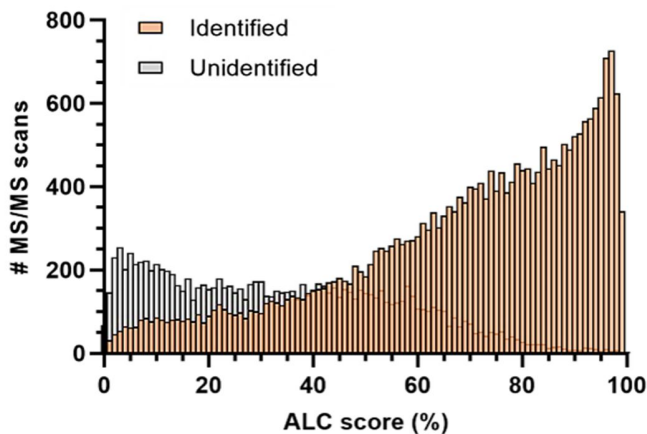

**Figure 7: Assessing the spectral quality of the acquired fragmentation spectra.** The Average Local Confidence (ALC) score distribution of identified (orange) and unidentified (grey) spectra, as shown for protocol 13 (biological replicate 1). In general, peptides with higher ALC score are more likely to provide a confident match during database search (because of the better fragment ion coverage of the peptide backbone, and the possibly ‘cleaner’ spectrum). The unidentified fraction from protocol 13 (grey) shows an ACL score distribution at predominantly lower numbers, indicating that the unidentified spectra largely derive from very low quality spectra, insufficient to provide a confident peptide sequence match. The fraction of higher ALC scoring spectra presumably derive from sequence variants or unexpected modifications not present in the database. Taxonomic impurities or
